# Supplementary material for: Effects of Water-soluble Organic Carbon on Aerosol pH
Source: Copernicus journal article supplement (doi:10.5194/acp-2019-344), 2019-04-30
Supplement: Supplementary file [file acp-2019-344-AC1-supplement.pdf]

## **Response to Referee Report**

We thank the Referees for their helpful suggestions and detailed comments. We have enumerated the points made by the referees below, and provided our responses to each point in blue text. We have also provided a revised manuscript with changes highlighted (starting on pg. 13 of this file).

### **Referee #1**

This article by Battaglia, Weber, Nenes and Hennigan explores effects of water-soluble organic compounds on aerosol acidity by means of thermodynamic modeling. Two data sets from field measurements distinct by acidity (Baltimore & Beijing) are used to provide information about inorganic constituents, aerosol mass concentration and the water-soluble organic fraction. The authors provide new insights into the effects of organic compounds on aerosol water content and the activity coefficient of H<sup>+</sup>. This topic is of interest for the atmospheric chemistry community, since aerosol acidity has been linked to a range of chemical and physical properties of particulate matter, but relatively few studies have attempted to quantify the effects of organic/inorganic mixing on aerosol pH. While certain effects of inorganic/organic aerosol mixing have been excluded in this work, e.g. liquid-liquid phase separation and lower relative humidity conditions, the study by Battaglia et al. provides interesting findings for single-phase aqueous aerosol by using a combination of state-of-the-art thermodynamic models. It is shown for the cases studied that the pH is largely controlled by the inorganic aerosol species, which is in agreement with other related studies (Pye et al., 2018). The manuscript is generally well structured and provides a good introduction about the need for understanding the effects of organic acids and non-acids on pH. However, the descriptions lack some details with regard to the methods employed and would benefit from additional discussion about the choice of a rather limited number of specific organic non-acids and dicarboxylic acids and how these may affect the simulation results. I am in support of the publication of this work after my minor points on methods and assumptions have been addressed by the authors. General and specific comments are provided below.

#### **General Comments**

1.) Factorial design method (pages 8, 9).

A factorial modeling experiment design was used to represent different combinations and concentration levels of organic compounds. Since this is not a widespread approach used by atmospheric chemists, it would be adequate to provide a better description of what was done exactly and why. For example, on page 9 is stated: "...and combined in factorial fashion: each organic acid concentration level combination of the three organic acids, and vice versa for the non-acid organic species. Combinations of organic acids and non-acid organic species were not explicitly considered here."

This could be phrased much better for clarity and perhaps an example could be provided to make clear what is meant (e.g. that the approach involves independent combinations, rather than permutations) and what is “factorial” about this method. Also, references to adequate literature describing this approach are missing.

We have added clarifying statements as to the nature and structure of the factorial design method, giving attention to the statistical design terms of ‘factors’ and ‘values.’ Additionally, we have provided a highly-cited textbook on statistical design that discussed factorial design of experiments. The updated text (lines 187-193) now reads, “A matrix was constructed to examine multiple combinations of the selected organic component composition levels (factorial design), and their effects evaluated on the basis of organic-to-inorganic ratio (OIR) or organic mass fraction, both computed on a dry particle basis. This full factorial design consists of three factors for each acid or non-acid condition (the identity of each species), each with discrete possible values (air concentrations in  $\mu\text{g m}^{-3}$ ), where the experiment incorporates all possible combinations of these values across all factors (Keppel, 1991).”

And (lines 220-226): “For each geographic region, 11 different concentrations were chosen for each WSOC compound ( $0\text{-}4 \mu\text{g m}^{-3}$  for Baltimore;  $0\text{-}40 \mu\text{g m}^{-3}$  for Beijing), and combined in factorial fashion: each organic acid concentration level combination of the three organic acids were examined in combination with every other level of the remaining two, and vice-versa for the non-acid organic species. Combinations of organic acids and non-acid organic species were not explicitly considered here; only combinations of organic acids with organic acids, or combinations of non-acids with non-acids were examined experimentally.”

## 2.) Liquid-liquid phase separation (LLPS)

Phase separation was not considered in the calculations from this study, but the topic is discussed in the introduction, which is valuable. It is well-known that non-ideal mixing in organic/inorganic solutions can cause LLPS, as the authors also point out. However, what remains unclear is how the authors concluded that their cases are not affected by phase separation. Page 8, line 8 – 12: “The RH in all simulations was fixed at either 70%, 80%, or 90%, with inorganic system inputs calculated and invariant at each RH level based on the initial input data from either Baltimore or Beijing to ensure deliquescence of inorganic aerosol particles, to understand the sensitivity of the model-predicted aerosol pH to changes in RH (ALW), and to avoid liquid-liquid phase separation as a potential cause of organic-influenced aerosol pH changes (Pye et al., 2018).”

It should be clarified how avoiding LLPS is related to deliquescence of inorganic particles. How sure are the authors that LLPS would not occur, say at 70% RH, in their systems when high amounts of organics are present? Was this checked quantitatively? For example, the authors could confirm that organic activity coefficients remain less than  $\sim 5 - 10$ , since studies like

Donahue et al. (2011, <https://doi.org/10.5194/acp-11-3303-2011>) suggest that “Somewhere between  $5 < \gamma < 10$  phase separation becomes very likely”. The LLPS constraints from You et al. 2013 (mentioned much later on page 19) could also be useful for the discussion in this context.

The referee brings up an excellent point. We have addressed the LLPS condition for the non-acid simulations quantitatively in revision in the following ways: using the parameterization of Bertram et al. ACP 2011, who define separation RH (SRH) as a function of O:C, we compute the mass-weighted O:C for all of our simulations, and compare the SRH to the simulation RH. We have noted that LLPS is highly unlikely to occur for the organic acid cases based on the experiments performed by You et al. ACP 2013.

For the initial Baltimore simulations, out of 1330 simulations utilizing 1-pentanol in the non-acid organics mixture, 372 are non-LLPS (28%) while 958 (72%) are projected to experience LLPS. Based on these results, we have altered our experimental approach by replacing 1-pentanol in the analysis with a more atmospherically-relevant compound with a higher O:C ratio: 2-methyltetrol (1-methylbutane-1,2,3,4-tetrol). This significantly increases the number of model cases that are not projected to experience LLPS. In performing this new analysis, we remove points that fall into the “likely LLPS” bin according to the Bertram et al. (2011) parameterization.

In changing the analysis, we have added a section under Methods where we explicitly discuss LLPS, and the approach we take in applying the Bertram et al. (2011) parameterization. We have extended the discussion to utilize more of the explanations from Pye et al. ACP, 2018 and Zuend and Seinfeld ACP 2012 who discuss the presence of  $H^+$  and water in both electrolyte- and organic-rich phases in systems that have undergone LLPS. We have added the following text (lines 346-363) to the Methods section:

#### **“Evaluation of LLPS and Accommodations for LLPS Scenarios**

The O:C ratio is a key factor that determines whether LLPS occurs in organic-containing particles (Song et al., 2018a; Freedman, 2017). We followed the parameterization found experimentally by Bertram et al. (2011) to evaluate the presence of LLPS in our simulations. This method uses the overall mixture O:C ratio to determine the separation RH of the mixture. If the modeled (in this case, specified/enforced) system RH is lower than the parameterized RH, LLPS is likely to occur. This was performed for each of the non-acid mixtures for both Baltimore and Beijing data to verify the claim that LLPS was not anticipated to occur. For each point in the non-acid model evaluations, the LLPS condition of Bertram et al. (2011) was employed, and the  $RH_{LLPS}$  predicted by the method compared against the system  $RH/H_2O$  activity reported by AIOMFAC. For cases where the parameterized  $RH_{LLPS}$  was higher than the predicted system RH, LLPS was anticipated to occur, and the point was flagged and excluded from further analysis. Out of 1331 simulations, Baltimore had 55% ( $n = 732$ ), 70% ( $n = 932$ ), and 75% ( $n = 998$ ) simulations that met the non-LLPS criteria at 70%, 80%, and 90% RH

respectively. Beijing had 85% ( $n = 1131$ ), 89% ( $n = 1185$ ), and 93% ( $n = 1238$ ) of simulations meet the non-LLPS conditions at 70%, 80%, and 90% RH respectively. Experimental work by You et al. (2013) indicates that glutaric acid, malonic acid, oxalic acid, or their mixtures do not undergo LLPS at any of the RHs investigated.”

### 3.) Acids vs. non-acid organics

In the abstract and similarly on page 18, line 19, it is stated that “surprisingly, non-acidic WSOC compounds were found to have a larger effect on pH than organic acids owing to their stronger impacts on  $\gamma_{H^+}$ ”. It is not made clear what is surprising, please clarify. Also, how robust is this result given the choice of rather small, polar and hygroscopic organic diacids in this study. Would the same explanation hold true if a diacid of lower O:C ratio (less hygroscopic) were used? Moreover, the finding may depend on how ISORROPIA, E-AIM, UNIFAC and AIOMFAC treat organic acids (accounting for dissociation or not); see specific comments.

We have extended and enhanced this portion of the analysis by replacing 1-pentanol in the organic non-acid case with 2-methyltetrol to create a more atmospherically relevant particle composition - this has changed the results to lead to the initially hypothesized result of increasing aerosol pH with increasing organic non-acid concentration. Similarly, we have used the E-AIM model predictions of pH in the organics acids case (modeling the Beijing data in E-AIM rather than ISORROPIA) to incorporate the explicit dissociation of organic acids (as AIOMFAC was found to not include those reactions). This result is only relevant for diacids of relatively low-volatility and high solubility; for larger acids with higher O:C it is likely that the results would be equally contradictory as in the cases using 1-pentanol vs. 2-MT. The statements in the conclusion have been changed to reflect the additional analyses performed with 2-MT and the use of E-AIM pH for the organic acids cases.

### **Specific Comments**

1.) Page 2, line 23: define the meaning of “aerosol strong acidity or total acidity”

The statement has been changed to include the definitions as follows: “pH, the parameter serving to define and describe the acidity of aqueous solutions, often has no direct correlation with proxy measurement methods such as aerosol strong acidity ( $H^+$  contributed by strong acids that dissociated completely at any pH level) or aerosol total acidity (dissociated  $H^+$  and undissociated  $H^+$  bound to weak acids) (Hennigan et al., 2015; Song et al., 2018).”

2.) P3, 16: “to obtain the pH of an aerosol distribution”. Since distribution is mentioned, would the same pH be expected for all aerosol particles over a considerable size range (e.g. ultrafine vs. larger accumulation mode particles)? Do the input data from measurements account for size modes?

This phrase has been changed to read “to obtain aerosol pH values.” We agree with the Referee that aerosol pH does vary with particle size, but it was not our intention to include the added dimension of ambient aerosol size distributions into our analysis (not one of the aims of this investigation). For the purposes of this article, the aerosols are treated as belonging to a single aggregate aerosol phase.

3.) P3, 110 - 15: the aerosol thermodynamic models are introduced. At this point it is appropriate to define the acronyms and to cite the key references describing the models, which are missing; see associated websites. Also, citing Ganbavale et al. (2015) in the context of AIOMFAC and its web model seems inadequate as that study does not concern organic-inorganic mixtures.

The initial introduction to the models has been modified to say: “The Extended Aerosol Inorganics Model (E-AIM, <http://www.aim.env.uea.ac.uk/aim/aim.php>) (Wexler and Clegg, 2002; Friese and Ebel, 2010) and the ISORROPIA-II model (Greek for ‘equilibrium,’ <http://isorroopia.eas.gatech.edu>) (Fountoukis and Nenes, 2007) are widely used to calculate aerosol pH for atmospheric and experimental particle distributions (Guo et al., 2017; Guo et al., 2016; Guo et al., 2015; Wang et al., 2016). The Aerosol Inorganics-Organics Mixtures Functional groups Activity Coefficient (AIOMFAC) model (<http://www.aiomfac.caltech.edu/model.html>) offers the most extensive treatment of organic-inorganic interactions (Zuend et al., 2008; Zuend et al., 2011) of models to date, but is primarily an activity coefficient model that does not solve full thermodynamic equilibrium calculations or phase diagrams as E-AIM and ISORROPIA do.”

4.) Pages 3 and 4 (first paragraph): AIOMFAC is discussed as only being an activity coefficient model, which seems correct, but the authors forgot to mention that there are equilibrium models based on AIOMFAC, including the one used by Pye et al. (2018), Hodas et al. (2015), Zuend et al. (2010, 2012) and others. The study by Pye et al. used both ISORROPIA and AIOMFAC-based equilibrium models to estimate aerosol pH. It seems that the authors only refer to the online model of AIOMFAC, which could be made clear. Also, do ISORROPIA, E-AIM, AIOMFAC solve the ion association/dissociation equilibria, like bicarbonate and bisulfate in aqueous systems? What about organic acid dissociation? There is an E-AIM model version for specific acids, but it seems that organic acid dissociation is not considered explicitly by the models, right? Discussion of this could be important for pH calculations in the context of diacids (of different pKa values) and when contrasting the effects of acidic vs. non-acidic organics.

The version of AIOMFAC used here was the online model, used exclusively as an activity coefficient model. ISORROPIA, E-AIM, and AIOMFAC all solve the ion association/dissociation problem, especially for the bisulfate/sulfate system which is of importance. E-AIM treats explicitly the partial dissociation of species used here in both the single and double deprotonated anion forms are included in the outputs. AIOMFAC treats all

organic acids as undissociated species, which informed further additions to this work detailed elsewhere.

The following clarifying statements have been added to the section to further detail the use of the models:

“While AIOMFAC has been used in combination with thermodynamic equilibrium models such as ISORROPIA-II (Pye et al., 2018), these are custom modifications to the models, and not reflected in the online versions used in this study.”

“An additional consideration between the models is their treatment of organic acids. E-AIM offers support for limited ( $n = 8$ ) organic acid species, and treats the dissociation equilibrium of organic acids. In contrast, AIOMFAC treats organic acids as non-dissociating, a model difference that is discussed in detail below. Note that the ion dissociation equilibria of inorganic species (such as  $\text{HSO}_4^-/\text{SO}_4^{2-}$ ) are explicitly considered in the equilibrium calculations of all three models employed in this study.”

5.) P4, l 15: Define LLPS

We have added the definition of liquid-liquid phase separation preceding the first use of the initialism LLPS.

6.) P5, l 5: Rephrase “increasing particle phase partitioning”; what kind of partitioning is meant? gas-particle, liquid-liquid?

We refer here to gas-particle phase partitioning of organic species. This comment has been clarified to say “increasing gas-particle phase partitioning.”

7.) P6, 112: Rephrase “S-curves” - these are known as sigmoid curves.

We have replaced the phrase ‘S-curves’ with the more accurate phrase ‘sigmoid curves.’

8.) P6, 116: how was the threshold uncertainty of 0.5 pH units determined? Cite a reference.

This sentence has been removed.

9.) P8, 118: What is “the standard table of AIOMFAC organic species”? this is unclear

This comment has been clarified to reflect that the organic species selected were chosen by their availability in the predefined list of organic species included in the AIOMFAC web interface.

10.) P10, 19: Clarify meaning of “Metastable mode” in this context. This seems to be a technical term used with ISORROPIA, but jargon should be avoided.

“Metastable” is not just jargon – it is used to describe a system that is not at a global equilibrium point. In this case, metastable means the system may be supersaturated with respect to the solubility of dissolved ions, but salts do not form. A simplified definition of ‘metastable mode’ (the formation of solids in the model being disabled) was added for clarifying purposes: “The formation of solids in the model was disabled (leading to potential supersaturated aerosols, metastable mode operation), based on the justifications in previous studies (Guo et al., 2015; 2018b)”.

11.) P11, 116: “The selected species and order of allocation of the ionic species appears to be dependent solely on the researcher, and a priori knowledge of which molecular species are likely to exist in the aerosol particle as the dissociated ionic species.” It is unclear what a priori knowledge is needed. Do the authors mean that the choice of species allocation affects model predictions or not?

The following clarifying statement has been added: “The selection of species is unlikely to affect model outcomes, as this is simply a way to account for the ionic species present in the AIOMFAC model inputs, which require matched cation-anion pairs, and are expected to be fully-dissociated in the aqueous phase during model evaluation.”

12.) P17, 11 - 4: The statements in this sentence appear to contradict each other. Is the increase of oxalic acid from 1 to 2  $\mu\text{g}/\text{m}^3$  not a discrete increase in concentration? Revise.

We have revised this statement to reflect the change from the AIOMFAC model to the E-AIM model for prediction of aerosol pH in the organic acids case. The use of E-AIM eliminates the presence of this unusual collection of points, and results in the removal of the poorly-worded section of the original manuscript.

13.) P17, 19 - 11: “Taken together, this may indicate that the system pH changes to such a point that one of the acids which may not previously have been fully dissociated begins to do so, spontaneously lowering system the pH by nearly 0.4 pH units”. Are you referring to inorganic acids here or to the dicarboxylic acids? If the latter, is AIOMFAC even computing the dissociation of acids (explicitly or implicitly)?

We have addressed this comment by specifically stating that this could be the effect of organic acid dissociation. However, further insights into the working of the AIOMFAC model reveal that the model does not explicitly treat these processes. Subsequently, it may be the result of a transitional point in the  $\text{HSO}_4^-/\text{SO}_4^{2-}$  equilibrium. We have accounted for this by utilizing the E-

AIM model, which does explicitly treat the acid dissociation of the selected organic acids for the prediction of aerosol pH in the organic acid cases.

14.) P18, 110: rephrase

This section has been rephrased in the following way: “The magnitudes of these observed pH changes, with the exception of the Beijing organic acids case at high ( $> 25 \mu\text{g m}^{-3}$  acids concentration) is not expected to significantly alter particle conditions or lead to changes in particle chemistry, except when the pH is close to the point where a given species is almost equally partitioned between the gas and particle phases (*i.e.* on the center/vertical portion of the titration-style sigmoid curves). This effect is demonstrated in the work of Guo et al. (2018b) and Vasilakos et al. (2018): when the pH lays on or near the inflection point of the sigmoid curve, a change of 0.5 pH units will have significant effect on species partitioning; however, when the pH is in the near-horizontal portions of the curve above or below the rapid transitional region, a change of 0.5 pH units will have negligible effect on partitioning, and thus particle chemistry.”

15.) P19, 15: “the situation becomes more complicated as there exists no accepted definition of pH for a predominantly-organic phase in which the solvent is the organic aerosol constituents rather than ALW.”

This referee considers this statement to be incorrect. Isn't the definition by IUPAC the accepted definition of pH, which was also used in this study? The definition of pH by IUPAC seems to be applicable in either situation; it solely depends on the  $\text{H}^+$  activity. Further, any (organic) phase containing dissolved  $\text{H}^+$  likely also contains some amount of water.

The Referee is correct and our manuscript has been corrected to state that pH could be defined in either phase. The statement in question has been corrected to say: “As LLPS scenarios still require equilibrium between both predominantly-aqueous and predominately-organic phases, there is both water and inorganic ions (including  $\text{H}^+$ ) in the organic phase, and organics in the inorganic-rich aqueous phase (Zuend and Seinfeld, 2012;Pye et al., 2018). Thus the IUPAC definition of pH could be applied to either phase so long as  $\text{H}^+$  activity could be defined, necessitating an understanding of if and when LLPS occurs, and the phase for which pH is being reported.”

16.) P19, 110: Didn't Pye et al. (2018) consider also cases with a single aqueous phase? Their Figure 3 suggest they had both LLPS and single phase cases for the SOAS field study.

Pye et al. (2018) did consider both cases within their SOAS investigation. Our investigation differs in that we seek only to pursue cases in which LLPS did not occur. We have modified our analysis using the LLPS condition specified by Bertram et al. (2011) to investigate only points where LLPS did not occur.



We have modified the statement to clarify this point. The new statement reads as: “This work stands apart from, but connects to related works. Pye et al. (2018) specifically examined the effects of LLPS, but the present study examines a different particle regime altogether (single aqueous phase with water, inorganics, and organics); instances where LLPS were predicted to occur were excluded from the analysis for this reason.”

17.) P21, 115: It is unclear how a “forced metastable condition” would help to avoid LLPS. These are two independent processes/states. Clarify.

This statement has been clarified to tie metastable operation to the formation of solid precipitates only. The metastable condition does not have bearing on avoiding LLPS, but rather to avoid precipitate formation, which could alter aqueous phase activity values. The statement has been clarified to read: “Because we have forced the metastable mode on our use of the models, the system mixing state becomes another potentially significant source of error. Here we have considered only internally mixed aerosol particles without LLPS, a case that may not exist given the concentration of organic species utilized in the model study; formation of solid precipitates may occur, which has the potential to drastically alter the aqueous phase activity values.”

18.) P22, 120: “for especially glassy aerosols” – unclear how viscosity and glassy aerosols are related to pH in this context. Glassy aerosols would indicate significant equilibration time scale effects, but what does that have to do with pH?

This statement has been modified to remove the phrase ‘glassy aerosols.’ We agree with the Referee that glassy phase states would indicate significant equilibration time scales, and that in this context, the relation to pH does not make sense.

19.) P23, 14: While the authors show that the aerosol pH value is mostly determined by inorganic species, the present study and previous work cover a relatively limited set of organic compounds and conditions. Hence, general conclusions should be stated carefully. One aspect that warrants further study and discussion concerns the partitioning of organic acids that may dissociate significantly at relatively high pH (say > 4) as well as the effects of amines acting as bases similar to ammonia. Therefore, it may be premature to conclude that exclusion of organics for future aerosol pH predictions is always justified. A disclaimer in that context may be appropriate.

We have taken strides to address this point in our reanalysis of the organic acid conditions utilizing E-AIM for model prediction of pH. We have added the clarification that AIOMFAC does not explicitly treat the dissociation of organic acids, and thus in our previous analysis we were not seeing the effects of this acid dissociation. By utilizing E-AIM, our re-analysis shows that there is a more pronounced effect on aerosol pH for the Beijing case, where the pH is in the

> 4 regime. This use of E-AIM for re-analysis shows more clearly the effect different pH regimes have on the organic acid cases. However, the results for Beijing remain relatively unpronounced until unrealistic quantities of organic acids are present. We have also clarified these statements made in the Conclusions section to better represent the results of the re-analysis employed.

## **Referee #2**

In “Effects of Water-soluble Organic Carbon on Aerosol pH”, the authors examine changes in pH due to water soluble organic acid with inorganic-organic single-phase aerosol systems, at conditions from two locations: Baltimore (more acidic) and Beijing (less acidic). In the manuscript, the authors detail use of three widely used thermodynamic models: E-AIM, ISORROPIA, and AIOMFAC for calculations of water content, activity coefficients, and pH. The results should that the impact of the organic content explored here on pH was minimal, and continues to support the role of the inorganic compounds in determining pH. However, there are some unanswered questions regarding the calculation methods, and in particular the role of dissociation equilibria of the organic acids, that should be clarified or handled in more depth. The paper would be of interest to the Atmospheric Chemistry and Physics readership, and should be considered for publications after the following are addressed.

### 1.) Organic acids and dissociation:

It was stated that “non-acidic WSOC were found to have a larger effect...than organic acids” due to their larger impact on H<sup>+</sup> activity. However, it is not clear how the models used handle the concentration and the concentration, ionic strength, and pH dependent dissociation of the weak organic acids. Clarify how AIOMFAC treats the organic acids. Selection of organic acids can be put into E-AIM, both with an UNIFAC treatment, and a fitted treatment, which, I believe, treats the organic acid as non-dissociating and partially-dissociating. It would be helpful to see the impact of the two treatments in the pH results. It may be that different treatment of the dissociation equilibrium may result in more significant changes in pH by the organic acid.

The Referee makes an excellent point, and our analysis has been modified. AIOMFAC does not explicitly treat the dissociation of the organic acid species. We have switched to using E-AIM for the aerosol pH model predictions in the organic acid cases. Subsequently, we find that the organic acid dissociation has an approximately equal effect for Baltimore (where pH is low from the start), and a more obvious effect for Beijing (where pH is higher initially). By accounting for this dissociation explicitly via the E-AIM model, we observe that the hypothesized trends in pH (*e.g.* that organic acid addition should decrease pH which it is initially high, and that non-acid organics addition should generally increase pH) hold.

## 2.) Effects due to selected method/models:

There remains an underlying question of if the results (e.g., the minimal impact of WSOC on aerosol pH) is due to the method and models used, versus being representative of the true pH in the Baltimore and Beijing conditions. It would be helpful to compare results with various treatments of organic acid dissociation equilibrium (see above comment) as well as organic-inorganic mixtures. For the later, one can add organic compounds to E-AIM, by way of using UNIFAC functional groups – how do the results from this method compare to the that with a combined E-AIM for the inorganic, AIOMFAC for the organic method used here? E-AIM was used for the Baltimore date, and ISORROPIA for the Beijing data – how do the results vary if this was switched? For example, a model-based impact likely explains the isolated group of points in Fig 4 (page 16 line 21 – page 17 line 11) – is that same group of points found with oxalic acid is treated using a different model?

We agree with the Referee's comment, however, the suggested analysis is not possible. The online version of AIOMFAC treats organic acids as non-dissociating species. ISORROPIA does not provide inclusion of organic acids. E-AIM treats organic acids as dissociating species, able to contribute  $H^+$  through full or partial dissociation. Therefore, direct comparison of predictions with the different models would be expected to be quite different. See our response to Referee #2, comment 1 above, as well.

## 3.) Effects of the inorganic salts and the model organics chosen:

How much impact did the choice of method to go from individual ions to salts (page 11) have on the results? How does this compare to results if the ions were evenly distributed into all the possible salt combinations? For the organics, more information on why the three particular non-acids were chosen. (line 22, page 8) Also, why were organic acids and non-organic acids not considered together? (line 5, page 9). Is it expected that having the mixture would impact the results?

We feel that the choice of salts exists primarily as an 'accounting' method to transform the outputs of the E-AIM or ISORROPIA model into inputs that AIOMFAC can interpret. As we have used measured (average) compositions, we selected salt species known to exist in inorganic aerosols; consideration of all the various salt combinations would have been prohibitive in the time frame for publication. Similarly, the exploration of organic acids and non-acid organics was not considered for similar reasons, in addition to leaving further analysis for future works once the method employed in this current study was peer-reviewed and published. However, we anticipate that having the mixtures would impact the results (e.g. as non-acid organics display an increase in pH placed against the downward or flat trend observed by organic acid addition).

We have addressed the Referee comments by adding the following to the discussion:

“The selection of species is unlikely to affect model outcomes, as this is simply a way to account for the ionic species present in the AIOMFAC model inputs, which require matched cation-anion pairs, and are expected to be fully-dissociated in the aqueous phase during model evaluation.”

“Levogluconan ( $C_6H_{10}O_5$ ), tetrahydrofuran ( $(CH_2)_4O$ ), and 2-methyltetrol (1-methylbutane-1,2,3,4-tetrol,  $C_5H_{12}O_4$ ), three organic species observed in ambient aerosols, were selected as the non-acid organic species.”

### Minor Comments

1.) Define what is meant by “...the thermodynamic equilibrium problem...” (line 2, page 4).

This statement was revised to explicitly state AIOMFAC is an activity coefficient model and does not solve the equilibrium calculations of E-AIM or ISORROPIA. The new line reads: “AIOMFAC offers wide support for organic components, but is an activity coefficient model that does not solve the equilibrium partitioning calculations for which the other models were designed.”

2.) What are the typical organic to inorganic mass ratios of the two region (line 1, page 9)

The following statement was added to answer the Referee’s question: “For Beijing, typical organic mass fractions can be on the order of 50-70% of total aerosol mass (Zhou et al., 2018), and 20-60% of total aerosol mass for continental mid-latitude locations like Baltimore (Carlton et al., 2009).”

3.) How much  $H^+$  was typically added for electroneutrality (line 19-20, page 9), compared to the other cations? Was it significant? Please comment.

The following clarifying statement was added: “The amount of  $H^+$  added was a not-insignificant amount, comprising approximately 65% of the amount of  $NH_4^+$  included in the model for Baltimore, but makes sense given the expected acidic nature of Eastern US, sulfate-rich aerosols.”

4.) “AIOFAC” typo, line 9, page 13

This typo has been corrected to say AIOMFAC.

# Effects of Water-soluble Organic Carbon on Aerosol pH

Michael A. Battaglia, Jr.<sup>1</sup>, Rodney J. Weber<sup>2</sup>, Athanasios Nenes<sup>2,3,4</sup>, Christopher J. Hennigan<sup>1\*</sup>

<sup>1</sup> Department of Chemical, Biochemical and Environmental Engineering, University of Maryland, Baltimore County, Baltimore, MD 21250, USA

<sup>2</sup> School of Earth and Atmospheric Sciences, Georgia Institute of Technology, Atlanta, GA 30332, USA

<sup>3</sup> Institute for Chemical Engineering Sciences, Foundation for Research and Technology – Hellas, Patras, 26504, Greece

<sup>4</sup> Laboratory of Atmospheric Processes and their Impacts, School of Architecture, Civil and Environmental Engineering, Ecole Polytechnique Fédérale de Lausanne, CH-1015, Lausanne, Switzerland

\*To whom correspondence should be addressed: email [hennigan@umbc.edu](mailto:hennigan@umbc.edu); phone: (410) 455-3515

## Abstract

Water soluble organic carbon (WSOC) is a ubiquitous and significant fraction of fine particulate matter. Despite advances in aerosol thermodynamic equilibrium models, there is limited understanding on the comprehensive impacts of WSOC on aerosol acidity (pH). We address this limitation by studying submicron aerosol that represent the two extremes in acidity levels found in the atmosphere: strongly acidic aerosol from Baltimore, MD, and weakly acidic conditions characteristic of Beijing, China. These cases are then used to construct mixed inorganic/organic single-phase aqueous particles, and thermodynamically analyzed by the E-AIM and ISORROPIA models in combination with activity coefficient model AIOMFAC to evaluate the effects of WSOC on the  $H^+$  ion activity coefficients ( $\gamma_{H^+}$ ) and activity (pH). We find that addition of organic acids and non-acid organic species concurrently increases  $\gamma_{H^+}$  and aerosol liquid water. Under the highly acidic conditions typical of the eastern U.S. (inorganic-only pH  $\sim 1$ ), these effects mostly offset each other, giving pH changes of  $< 0.5$  pH units even at organic aerosol dry mass fractions in excess of 60%. Under conditions with weaker acidity typical of Beijing (inorganic-only pH  $\sim 4.5$ ), the non-acidic WSOC compounds had similarly minor effects on aerosol pH, but organic acids imparted the largest changes in pH compared to the inorganic-

31 only simulations. Organic acids affect pH in the order of their pK<sub>a</sub> values (oxalic acid > malonic  
32 acid > glutaric acid). Although the inorganic-only pH was above the pK<sub>a</sub> value of all three  
33 organic acids investigated, pH changes in excess of 1 pH unit were only observed at unrealistic  
34 organic acid levels (aerosol organic acid concentrations > 35 μg m<sup>-3</sup>) in Beijing. The model  
35 simulations were run at 70%, 80%, and 90% relative humidity (RH) levels and the effect of  
36 WSOC was inversely related to RH. At 90% RH, WSOC altered aerosol pH by up to ~0.2 pH  
37 units, though the effect was up to ~0.6 pH units at 70% RH. The somewhat offsetting nature of  
38 these effects suggests that aerosol pH is sufficiently constrained by the inorganic constituents  
39 alone under conditions where liquid-liquid phase separation is not anticipated to occur.

## 40 **1. Introduction**

41 The acidity of atmospheric particles plays a critical role in many physicochemical processes.  
42 Some of these processes include sulfur oxidation and halogen chemistry, with important  
43 implications for the formation of sulfates (Chameides, 1984); the oxidation of volatile organic  
44 compounds (VOCs), and ozone formation in marine environments (Keene et al., 1998); the gas-  
45 particle partitioning of many semi-volatile species (Ahrens et al., 2012; Keene et al., 2004); and,  
46 enhancements to secondary organic aerosol (SOA) formation (Hallquist et al., 2009). The  
47 inorganic salt constituents in atmospheric particles, such as ammonium sulfate ((NH<sub>4</sub>)<sub>2</sub>SO<sub>4</sub>) and  
48 ammonium bisulfate (NH<sub>4</sub>HSO<sub>4</sub>), contribute to particle acidity and water content, with effects on  
49 aerosol radiative forcing (Seinfeld and Pandis, 2016). In addition to the physicochemical effects  
50 within particles, their bulk acidity can affect health, both of environmental ecosystems and the  
51 human populations therein either directly (Gwynn et al., 2000; Peters et al., 1996; Schindler,  
52 1988; Spengler et al., 1996; Fang et al., 2017; Johnson et al., 2008), or by their effects on  
53 nutrient deposition (Myriokefalitakis et al., 2016; Myriokefalitakis et al., 2018; Kanakidou et al.,  
54 2016; Nenes et al., 2011).

55 pH, the parameter serving to define and describe the acidity of aqueous solutions, often has no  
56 direct correlation with proxy measurement methods such as aerosol strong acidity ( $H^+$   
57 contributed by strong acids that dissociated completely at any pH level) or aerosol total acidity  
58 (dissociated  $H^+$  and undissociated  $H^+$  bound to weak acids) (Hennigan et al., 2015; Song et al.,  
59 2018b). The most accurate predictions of aerosol pH come from aerosol thermodynamic  
60 equilibrium models constrained by both aerosol and gas-phase measurements (i.e., “forward  
61 mode” calculations), or from the measured gas-particle partitioning of semi-volatile species,  
62 including ammonia, nitric acid, or oxalic acid, which provide direct insight to the pH (Hennigan  
63 et al., 2015). Both approaches utilize aerosol and gas-phase composition measurements, along  
64 with the temperature and relative humidity, to obtain aerosol pH values. Consistent pH values  
65 are obtained when the assumptions about aerosol mixing and equilibrium are met (Guo et al.,  
66 2018a; Guo et al., 2018b).

67 Different aerosol thermodynamic equilibrium models have been developed through the years,  
68 each with a unique sets of assumptions, simplifications and approach to obtain the composition  
69 at thermodynamic equilibrium. The Extended Aerosol Inorganics Model (E-AIM,  
70 <http://www.aim.env.uea.ac.uk/aim/aim.php>) (Wexler and Clegg, 2002; Friese and Ebel, 2010)  
71 and the ISORROPIA-II model (Greek for ‘equilibrium,’ <http://isorrophia.eas.gatech.edu>)  
72 (Fountoukis and Nenes, 2007) are widely used to calculate aerosol pH for atmospheric and  
73 experimental particle distributions (Guo et al., 2017; Guo et al., 2016; Guo et al., 2015; Wang et  
74 al., 2016). The Aerosol Inorganics-Organics Mixtures Functional groups Activity Coefficient  
75 (AIOMFAC) model (<http://www.aiomfac.caltech.edu/model.html>) offers the most extensive  
76 treatment of organic-inorganic interactions (Zuend et al., 2008; Zuend et al., 2011) of models to  
77 date, but is primarily an activity coefficient model that does not solve full thermodynamic

78 equilibrium calculations or phase partitioning as E-AIM and ISORROPIA do. At present, E-  
79 AIM, ISORROPIA, and AIOMFAC are widely used for atmospheric applications due to their  
80 demonstrated predictive capabilities and their accessibility: they are freely available online, and  
81 include resources and user guides to facilitate their application and use.

82 One key difference among the models is their treatment of organics. ISORROPIA does not  
83 include organic species. E-AIM functions similarly to ISORROPIA when considering inorganic  
84 species, but in addition offers a limited library of organic acids (included by UNIFAC methods  
85 or fitted activity equations). AIOMFAC offers wide support for organic components, but is an  
86 activity coefficient model that does not solve the equilibrium partitioning calculations for which  
87 the other models were designed. While AIOMFAC has been used in combination with  
88 thermodynamic equilibrium models such as ISORROPIA-II (Pye et al., 2018), these are custom  
89 modifications to the models, and not reflected in the online versions used in this study. These  
90 models, and most others, do not treat organics in a way that is comprehensive (that is,  
91 simultaneous consideration of activity coefficient calculations and thermodynamic equilibrium  
92 calculations). However, these simplified thermodynamic models do seem to capture the  
93 partitioning of inorganic species well, even when organic components are present in large  
94 quantities, which indicates that pH should be captured well (Guo et al., 2018a). An additional  
95 consideration between the models is their treatment of organic acids. E-AIM offers support for  
96 limited ( $n = 8$ ) organic acid species, and treats the dissociation equilibrium of organic acids. In  
97 contrast, AIOMFAC treats organic acids as non-dissociating, a model difference that is discussed  
98 in detail below. Note that the ion dissociation equilibria of inorganic species (such as  $\text{HSO}_4^-$   
99  $/\text{SO}_4^{2-}$ ) are explicitly considered in the equilibrium calculations of all three models employed in  
100 this study.



101 The effects of WSOC on aerosol pH come through two primary means: dilution of the aqueous  
102 phase by aerosol liquid water associated with the organic fraction ( $W_o$ ); and changes to the  
103 hydrogen ion activity coefficient and thus hydrogen activity in solution ( $\gamma_{H^+}$  and  $a_{H^+}$ ,  
104 respectively). The total contribution of organics to aerosol water can be as much as 30-50% of  
105 total fine particle aerosol water in the polluted Beijing winter haze events (Tan et al., 2018;  
106 Huang et al., 2014), 40-50% in the southeast United States (Nah et al., 2018; Guo et al., 2015),  
107 and the eastern Mediterranean (Bougiatioti et al., 2016). The effects of organics (soluble and  
108 insoluble) on aerosol pH under conditions of **liquid-liquid phase separation** (LLPS) are more  
109 complex. Free  $H^+$  ion is predicted to have increased association with  $SO_4^{2-}$  to form  $HSO_4^-$  when  
110 organic compounds are in the same phase as inorganic ions, resulting in a 0.1 pH unit increase in  
111 aerosol pH (Pye et al., 2018). The isolation of the organic components in a separate phase  
112 (LLPS condition) also alters the partitioning behavior of  $NH_3$ , a critical component that  
113 contributes to aerosol pH. The inclusion, or lack thereof, of organic compounds was predicted to  
114 have a greater effect on  $NH_3$  partitioning behavior than the inclusion, or lack thereof, of  
115 nonvolatile cations, nitrate, and chloride (Guo et al., 2018a). In addition to these effects,  
116 AIOMFAC predicts that any organic presence in the same phase with inorganic constituents  
117 drives free  $H^+$  to increased association with sulfate to form bisulfate, a compound predicted to be  
118 more miscible with organics than  $H^+$  and small cations. AIOMFAC was used to show that the  
119 organic phase of liquid-liquid phase separated particles still contains a significant amount of  
120 inorganics, affecting the partitioning medium by inclusion of the inorganic ions and their  
121 associated water, lowering the mole fraction and activity of organics, and **shifting the gas-**  
122 **particle partitioning** of organic compounds with  $O:C > 0.6$  (Pye et al., 2018). In the case where  
123 multiple phases do exist, there is anticipated to be a primarily-organic (PO) and primarily-

124 inorganic (PI) phase, each of which contains  $H^+$  in equilibrium with the other phase. In cases  
125 where the vast majority of inorganics are partitioned to the PI phase, the pH is not anticipated to  
126 change drastically, as  $H^+$  is also required to be in equilibrium with the other phases, which may  
127 explain the results of (Pye et al., 2018). In the case of phase separation where the PO phase  
128 contains considerable amounts of inorganic species, there exists the possibility of a PI phase with  
129 substantially-altered  $H^+$  activity, and therefore, the potential for substantially-altered aerosol pH  
130 (eg. (Dallemagne et al., 2016)). The present study avoids such complexity and instead considers  
131 mixed organic-inorganic particles present in a single aqueous phase.

132 Aerosol pH can also be directly affected by organic acids, whose dissociation produces  $H^+$  ions  
133 in the particle aqueous phase. Carboxylic acids represent a highly abundant moiety in  
134 atmospheric OA (Yatavelli et al., 2015; Kawamura and Bikkina, 2016; Nah et al., 2018).  
135 Although these atmospheric organic acids are typically weaker acids with higher  $pK_a$  values than  
136 common inorganic acids ( $H_2SO_4$  and  $HNO_3$ ), they may contribute to particle acidity in some  
137 environments (Trebs et al., 2005). However, this effect is not present in all environments and is  
138 constrained to situations where the pH is in the range of the  $pK_a$  of the acid in question (Nah et  
139 al., 2018; Song et al., 2018b). As both organic acids and non-acid organic species are expected  
140 to be present, there are competing effects within the particle: dilution by the water fraction  
141 associated with organic constituents, direct acidification by the dissolution of organic acids, and  
142 the change in  $\gamma_{H^+}$  by interactions with the additional species in solution.

143 Oxalic acid (measured as the oxalate ion) is often the most abundant carboxylic acid in  
144 atmospheric aerosols (Bikkina et al., 2015). Several studies utilized E-AIM Model IV to  
145 evaluate the effect of oxalic acid on particle acidity (Vasilakos et al., 2018; Song et al., 2018b).  
146 With inorganics similar in composition to that of Baltimore, conditions applied in this study, an

147 increase of 25-50% of oxalic acid compared to the base case had an insignificant effect on  
148 aerosol pH when only one liquid phase was present. Pye et al. (2018) utilized data from the  
149 Southern Oxidant and Aerosol Study (SOAS) in ISORROPIA and AIOMFAC to investigate the  
150 gas-particle partitioning of ammonia, water, and organic compounds, and how liquid-liquid  
151 phase separation (LLPS) in particles can affect aerosol pH, predicting a 0.7 pH unit increase  
152 when the organic fraction and its diluting effect was considered. Generally, aerosol processes  
153 are not affected by a pH change of this magnitude, except in the regions on the thermodynamic  
154 sigmoid curves of semi-volatile species where partitioning is shown to vary greatly for small  
155 changes in pH (Nah et al., 2018; Guo et al., 2018b).

156 In this work, we explore the effects of WSOC on aerosol pH in a systematic way by utilizing  
157 inorganic data to construct combinations of single, aqueous phase particulate compositions, and  
158 utilizing aerosol thermodynamic models to investigate the effects of different WSOC species and  
159 concentrations on  $\gamma_{\text{H}^+}$  and  $a_{\text{H}^+}$ .

## 160 **2. Methods**

### 161 **Data**

162 Inorganic and meteorological data used for this study were reported in prior work. Briefly, data  
163 from Baltimore, MD were taken from (Battaglia et al., 2017), and include speciated inorganic  
164  $\text{PM}_{2.5}$  concentrations, meteorological data, and gas-phase  $\text{NH}_3$  measurements. The data used as  
165 thermodynamic model inputs are summertime (July) averages based on 3- or 5-years of  
166 monitoring. All model inputs and outputs are available in the Supporting Information.

167 Aerosol inorganic composition, gas-phase  $\text{NH}_3$  measurements, and meteorological parameters  
168 were obtained during a study of winter haze formation in Beijing, China in 2015 (Wang et al.,

169 2016). These data represent a contrast with Baltimore due to different source contributions,  
170 differences in  $\text{NH}_3$  concentrations, T, RH, and inorganic aerosol levels. The inorganic  $\text{PM}_{2.5}$   
171 concentrations, and averaged seasonal T and RH, along with  $\text{NH}_3$  gas concentration values were  
172 obtained as model-ready inputs of the Beijing winter haze data from (Guo et al., 2018b), based  
173 on supplemental information from (Wang et al., 2016).

## 174 **General Approach**

175 The general approach to this study was to utilize the inorganic PM and  $\text{NH}_3$  data described  
176 above, in combination with various additional WSOC constituents, as inputs to aerosol  
177 thermodynamic equilibrium models to investigate the effects on model-predicted aerosol pH and  
178  $\gamma_{\text{H}^+}$ . Inorganic data were modeled in either E-AIM IV or ISORROPIA-II to obtain equilibrium  
179 concentrations of aerosol liquid water (ALW) along with all inorganic aerosol ionic species.  
180 Organic constituents were then added to this invariant inorganic matrix (assuming the added  
181 organic mass was at equilibrium), at identical T and RH, and the resulting particle compositions  
182 were modeled in AIOMFAC to obtain aerosol  $\text{H}^+$  ion activity ( $a_{\text{H}^+}$  and  $\gamma_{\text{H}^+}$ ), and thus aerosol pH.  
183 The average inorganic composition, gas-phase  $\text{NH}_3$ , and meteorological conditions were held  
184 approximately constant for each location, while WSOC composition and concentrations were  
185 systematically varied. A matrix was constructed to examine multiple combinations of the  
186 selected organic component composition levels (factorial design), and their effects evaluated on  
187 the basis of organic-to-inorganic ratio (OIR) or organic mass fraction, both computed on a dry  
188 particle basis. This full factorial design consists of three factors for each acid or non-acid  
189 condition (the identity of each species), each with discrete possible values (air concentrations in  
190  $\mu\text{g m}^{-3}$ ), where the experiment incorporates all possible combinations of these values across all  
191 factors (Keppel, 1991). For each location, this resulted in a total of 7986 model simulations in

192 total, with 1331 simulations run for both cases of organic compounds selected, and at each of  
193 three distinct RH level, as described below. A summary of the models run for each location is  
194 shown in **Table 1**. The RH in all simulations was fixed at either ~70%, ~80%, or ~90%, with  
195 inorganic system inputs calculated and invariant at each RH level based on the initial input data  
196 from either Baltimore or Beijing to ensure deliquescence of inorganic aerosol particles, to  
197 understand the sensitivity of the model-predicted aerosol pH to changes in RH (ALW), and to  
198 avoid liquid-liquid phase separation as a potential cause of organic-influenced aerosol pH  
199 changes (Pye et al., 2018). For all of the results presented in this analysis, aerosol pH was  
200 computed as the negative base-ten logarithm of the hydrogen ion activity taken from the E-AIM  
201 or AIOMFAC output ( $\text{pH} = -\log_{10} a_{\text{H}^+}$ ) on a molality basis.

## 202 **Organic Constituents**

203 Water-soluble organic compounds were selected by broadly classifying them as organic acids or  
204 non-acid organics. Within each category, three individual species were selected based on their  
205 detection in atmospheric particles and their availability in the predefined list of AIOMFAC  
206 organic species available on the AIOMFAC web interface, or the ability to reasonably construct  
207 them using the functional groups approach of AIOMFAC. In addition, non-acid organics were  
208 selected from three different primary moiety groups from among the AIOMFAC standard  
209 species. Oxalic acid ( $\text{C}_2\text{H}_2\text{O}_4$ ,  $\text{pK}_{\text{a}1} = 1.23$ ,  $\text{pK}_{\text{a}2} = 4.19$ ) (Lide 1994), glutaric acid ( $\text{C}_5\text{H}_8\text{O}_4$ ,  
210  $\text{pK}_{\text{a}1} = 4.31$ ,  $\text{pK}_{\text{a}2} = 5.41$ ) (Lide, 1994), and malonic acid ( $\text{C}_3\text{H}_3\text{O}_4$ ,  $\text{pK}_{\text{a}1} = 2.83$ ,  $\text{pK}_{\text{a}2} = 5.69$ )  
211 (Lide, 1994) were selected as the three dicarboxylic acid species. Levoglucosan ( $\text{C}_6\text{H}_{10}\text{O}_5$ ),  
212 tetrahydrofuran ( $(\text{CH}_2)_4\text{O}$ ), and 2-methyltetrol (1-methylbutane-1,2,3,4-tetrol,  $\text{C}_5\text{H}_{12}\text{O}_4$ ), three  
213 organic species observed in ambient aerosols, were selected as the non-acid WSOC species.  
214 Concentration levels were not constrained by observations, but were instead selected to achieve

215 similar organic to inorganic mass ratios for each of the two geographic regions being considered.  
216 For Beijing, typical organic mass fractions can be on the order of 50-70% of total aerosol mass  
217 (Zhou et al., 2018), and 20-60% of total aerosol mass for continental mid-latitude locations like  
218 Baltimore (Carlton et al., 2009). For each geographic region, 11 different concentrations were  
219 chosen for each WSOC compound ( $0\text{-}4\ \mu\text{g m}^{-3}$  for Baltimore;  $0\text{-}40\ \mu\text{g m}^{-3}$  for Beijing), and  
220 combined in factorial fashion: each organic acid concentration level combination of the three  
221 organic acids were examined in combination with every other level of the remaining two, and  
222 vice-versa for the non-acid organic species. Combinations of organic acids and non-acid organic  
223 species were not explicitly considered here; only combinations of organic acids with organic  
224 acids, or combinations of non-acids with non-acids were examined experimentally. All model  
225 inputs and outputs are included in the Supporting Information.

## 226 **Thermodynamic Model Input Configuration and Equilibrium Model Evaluations**

227 E-AIM Model IV provides thermodynamic equilibrium modeling of the  $\text{H}^+\text{-NH}_4^+\text{-Na}^+\text{-SO}_4^{2-}\text{-}$   
228  $\text{NO}_3^-\text{-Cl}^-\text{-H}_2\text{O}$  system at temperatures from 263.15 K to 330 K for subsaturated systems that  
229 contain  $\text{NH}_4^+$  and  $\text{Cl}^-$ , or  $\text{Na}^+$  in combination with other ions (Friese and Ebel, 2010). Data for  
230 Baltimore and Beijing were formatted for E-AIM input in the following ways: average inorganic  
231 species concentrations ( $\mu\text{g m}^{-3}$ ) were converted to  $\text{mol m}^{-3}$ ; the average daily temperature for the  
232 same period was used as the temperature input; the relative humidity of the system was fixed (at  
233 70%, 80%, or 90%) both to ensure the inorganic system was in a deliquesced state and because  
234 of the RH restrictions (subsaturated solution requirements,  $\text{RH} > 0.6$ ) on E-AIM Model IV  
235 inputs. In addition to fixing system RH at 70%, 80%, or 90%, the aerosol metastable (solid  
236 precipitate formation disabled) mode was enforced on the model by disabling the formation of all  
237 solids in the model input matrix, according to the analysis and recommendation of Guo et al.

238 (2018b; 2015). Crustal species ( $\text{Ca}^{2+}$ ,  $\text{Mg}^{2+}$ ,  $\text{K}^{+}$ ) not supported by the model were not  
239 considered, and the persistent cation deficiency was corrected by the addition of  $\text{H}^{+}$  to the system  
240 to ensure electroneutrality. The amount of  $\text{H}^{+}$  added was a not-insignificant amount, comprising  
241 approximately 65% of the amount of  $\text{NH}_4^{+}$  included in the model for Baltimore, but makes sense  
242 given the expected acidic nature of eastern US, sulfate-rich aerosols (Weber et al., 2016). For  
243 Beijing, a persistent anion deficiency was addressed by addition of  $\text{OH}^{-}$  to the system to ensure  
244 electroneutrality. The amount of  $\text{OH}^{-}$  added to the system for the Beijing case was one order of  
245 magnitude lower than the cation species, but on the same order of magnitude and 4-7 times lower  
246 than any other anion except  $\text{Cl}^{-}$ .

247 E-AIM offers support for certain organic acid species. For the Baltimore and Beijing  
248 simulations, the organic acid species were added directly to the E-AIM model inputs. In the case  
249 of organic acid model runs, factorial combinations of the organic acid species at 0.0, 0.01, 0.02,  
250 0.04, 0.08, 0.16, 0.32, 0.5, 1, 2, and  $4 \mu\text{g m}^{-3}$  (Baltimore) and 0.0, 1, 2, 5, 10, 15, 20, 25, 30, 35,  
251 and  $40 \mu\text{g m}^{-3}$  (Beijing) and were converted to  $\text{mol m}^{-3}$  input. Formation of organic solids was  
252 also disabled as part of the metastable equilibrium condition. For the non-acid organics, the  
253 addition of the selected species to the E-AIM equilibrium calculation was not possible, and the  
254 model was run with the inorganic constituents only. E-AIM provides output of the aqueous  
255 species mole fractions and mole fraction-based activity coefficients; this mole fraction-based  
256 aerosol pH was converted to a molality-based aerosol pH utilizing known thermodynamic  
257 relations (Robinson and Stokes, 1965; Jia et al., 2018).

## 258 ISORROPIA-II Model Input Configuration and Equilibrium Model Evaluations

259 ISORROPIA-II provides thermodynamic equilibrium modeling for the  $\text{H}^{+}$ - $\text{NH}_4^{+}$ - $\text{Na}^{+}$ - $\text{SO}_4^{2-}$ - $\text{NO}_3^{-}$   
260  $\text{Cl}^{-}$ - $\text{Ca}^{2+}$ - $\text{Mg}^{2+}$ - $\text{K}^{+}$ -  $\text{H}_2\text{O}$  across a wide range of temperature and RH values without limitation

261 based on the input composition (Fountoukis and Nenes, 2007). Data for Beijing were already  
262 formatted for use in ISORROPIA-II as described above (Guo et al., 2018b). The formation of  
263 solids in the model was disabled (leading to potential supersaturated aerosols, metastable mode  
264 operation), based on the justifications in previous studies (Guo et al., 2015; Guo et al., 2018b)  
265 and to maintain consistency with the E-AIM model conditions. An initial model run was  
266 performed to verify that identical model outputs were obtained using the inputs of Guo et al.  
267 (2018b). For the purposes of this investigation, the RH value was changed from the Beijing  
268 average ambient value of 56% to 70%, 80%, or 90%, consistent with the model input for the  
269 Baltimore data for the same reasons discussed above. The Beijing average ambient temperature  
270 of 274.05 K was used in the Beijing inorganic model calculations with the three RH values.

#### 271 **AIOMFAC Model Input Configuration and Equilibrium Model Evaluations**

272 E-AIM was utilized to determine the equilibrium composition of the inorganic aerosol, including  
273 the NH<sub>3</sub> phase partitioning and the aerosol liquid water content. Outputs from E-AIM were then  
274 used as inputs into AIOMFAC to characterize the organic effects on aerosol H<sup>+</sup> activity, and  $\gamma_{H^+}$   
275 (Figure 1). The E-AIM outputs (AIOMFAC inputs) were also checked for consistency with  
276 ISORROPIA to ensure that the applied model assumptions (H<sup>+</sup> and OH<sup>-</sup> as balancing species to  
277 achieve electroneutrality) provided reasonable results.

278 The particle-phase outputs from the E-AIM model runs were used as inputs to AIOMFAC;  
279 however, this required significant adjustments to the format to fit the AIOMFAC model.  
280 AIOMFAC requires inorganic species inputs to be entered as ionic *pairs* (whole molecular  
281 species entered as a cation and anion pair) in order to guarantee electroneutrality. Therefore, the  
282 ionic species outputs of E-AIM were converted to molecular species inputs by assigning pairs,  
283 and then performing a stoichiometric balance until all ions were accounted for (*i.e.* E-AIM H<sup>+</sup>



284 and  $\text{SO}_4^{2-}$  being combined in stoichiometric fashion as  $\text{H}_2\text{SO}_4$  with corresponding reductions in  
285 the ‘pool’ of E-AIM  $\text{H}^+$  and  $\text{SO}_4^{2-}$ ). In the Baltimore case for the pure inorganic input (all  
286 organic species modeled at  $0.0 \mu\text{g m}^{-3}$  concentration), E-AIM Model IV provided particle-phase  
287 output for the following ions:  $\text{H}^+$ ,  $\text{NH}_4^+$ ,  $\text{Na}^+$ ,  $\text{HSO}_4^-$ ,  $\text{SO}_4^{2-}$ ,  $\text{NO}_3^-$ , and  $\text{OH}^-$ . In order to format  
288 these concentrations for AIOMFAC-specific inputs (that is, to compute the necessary mole  
289 fraction format of molecular species in the aerosol), the ions were assigned in the following  
290 ways. First, all  $\text{SO}_4^{2-}$  was associated with  $\text{H}^+$  for the  $\text{H}_2\text{SO}_4$  pair in AIOMFAC. All  $\text{NO}_3^-$  was  
291 associated with  $\text{Na}^+$  for the  $\text{NaNO}_3$  pair. Remaining  $\text{Na}^+$  was associated with  $\text{SO}_4^{2-}$ , then  $\text{NH}_4^+$   
292 with  $\text{HSO}_4^-$  and remaining  $\text{NH}_4^+$  with the remaining  $\text{SO}_4^-$ . This allocation process proceeded  
293 similarly for the Beijing data. The selected species and order of allocation of the ionic species  
294 appears to be dependent solely on the user, and *a priori* knowledge of which molecular species  
295 are likely to exist in the aerosol particle as the dissociated ionic species. The selection of species  
296 is unlikely to affect model outcomes, as this is simply a way to account for the ionic species  
297 present in the AIOMFAC model inputs, which require matched cation-anion pairs, and are  
298 expected to be fully-dissociated in the aqueous phase during model evaluation. The end result is  
299 a mixture of inorganic molecular species containing the full concentration values generated by E-  
300 AIM assumed to be dissociated within the aerosol where each functional group can contribute to  
301 species activity based on the AIOMFAC model paradigm; assignment of molecular species  
302 pairings is performed only on the basis of formatting specifically for the AIOMFAC model.  
303 The inorganic inputs used in the AIOMFAC models for both Baltimore and Beijing simulations  
304 are given in **Table 2**.

305 An additional key step in formatting the E-AIM output for input to AIOMFAC is in the model  
306 treatment of the water associated with organic constituents,  $W_o$ . E-AIM provided output of  $W_o$ .

307 as a part of the total aerosol liquid water ( $ALW; W_i + W_o$ ) for the organic acid simulations, but  
308 provides no estimate of  $W_o$  for the non-acid simulations. RH is not an input to the AIOMFAC  
309 model runs. Rather, AIOMFAC requires the input of all species (inorganic and organic) in mole  
310 fractions, and assumes the difference between the total inputs and unity is contributed by water,  
311 the water activity of which is equal to the ambient relative humidity. Therefore, accounting for  
312 the water contributed by the organic species was an additional step in formatting the E-AIM  
313 outputs for AIOMFAC input as described below.

314 For two of the four cases (Baltimore and Beijing inorganics plus non-acid organics),  $W_o$  was  
315 added to the system by the following process, a flow diagram of which is shown in **Figure 1**.  
316 For the first 11 points of the factorial design (representing the addition of only the first organic  
317 constituent at each concentration level) and the final 11 points of the factorial design  
318 (representing the 11 highest organic addition points, including the addition of all three organic  
319 species at their maximum selected concentration), total system moles were varied manually by  
320 increasing the inorganic model-predicted moles of aerosol water. AIOMFAC inputs (as mole  
321 fractions) were calculated using this adjusted total mole value. The 22 manually-adjusted points  
322 were modeled in AIOMFAC. If the option for liquid water is selected (as it was in all of our  
323 simulations), AIOMFAC assumes that water makes up the difference between the mole or mass  
324 fraction of all inputs summed together and unity. To achieve consistency with the inorganic  
325 model results, the total moles of the system were manually adjusted until the RH output  
326 generated by the AIOMFAC model was within ~5% of the RH value fixed for the inorganic  
327 systems. Once this close fit was achieved for the 22 selected points, they were used to generate  
328 polynomial fits of the total moles added to the system as  $W_o$  versus total organic mass  
329 (regardless of species). These polynomial fits were then applied to all model points to adjust the

330 total system moles through the addition of liquid water associated with organic mass, resulting in  
331 AIOMFAC-predicted RH values within 5% of the E-AIM RH values of 70%, 80%, or 90%.  
332 This method of accounting for  $W_o$  is a strictly mathematical construct, and does not reflect the  
333 use of a species-dependent organic hygroscopicity parameter, which would have been prohibitive  
334 to apply for each point across all cases and RH levels. Additionally, following the introduction  
335 of the adjusted  $W_o$  to the system, the gas-phase was not allowed to re-equilibrate to the new  
336 water content contributed by the organic species. This provides a conservative (high) constraint  
337 on the effect of  $W_o$  (Guo et al., 2015).

### 338 **Evaluation of LLPS and Accommodations for LLPS Scenarios**

339 The O:C ratio is a key factor that determines whether LLPS occurs in organic-containing  
340 particles (Song et al., 2018a; Freedman, 2017). We followed the parameterization found  
341 experimentally by Bertram et al. (2011) to evaluate the presence of LLPS in our simulations.  
342 This method uses the overall mixture O:C ratio to determine the separation RH of the mixture. If  
343 the modeled (in this case, specified/enforced) system RH is lower than the parameterized  
344 separation RH ( $RH_{LLPS}$ ), LLPS is likely to occur. This was performed for each of the non-acid  
345 mixtures for both Baltimore and Beijing data to verify the claim that LLPS was not anticipated to  
346 occur. For cases where the parameterized  $RH_{LLPS}$  was higher than the predicted system RH,  
347 LLPS was anticipated to occur, and the point was flagged and excluded from further analysis.  
348 Out of 1331 simulations, Baltimore had 55% ( $n = 732$ ), 70% ( $n = 932$ ), and 75% ( $n = 998$ )  
349 simulations that met the non-LLPS criteria at 70%, 80%, and 90% RH respectively. Beijing had  
350 85% ( $n = 1131$ ), 89% ( $n = 1185$ ), and 93% ( $n = 1238$ ) of simulations meet the non-LLPS  
351 conditions at 70%, 80%, and 90% RH respectively. Experimental work by (You et al., 2013)

352 indicates that glutaric acid, malonic acid, oxalic acid, or their mixtures do not undergo LLPS at  
353 any of the RHs investigated.

### 354 **3. Results and Discussion**

#### 355 **Effects of WSOC on Aerosol $\gamma_{H^+}$**

356 AIOMFAC-predicted aerosol pH and  $\gamma_{H^+}$  versus the organic dry mass fraction (total mass of  
357 organics/mass inorganics, excluding ALW), along with aerosol liquid water used in the model  
358 evaluations for the non-acid species runs in Baltimore and Beijing at all RH levels, are shown in  
359 Figures 2 and 3. For the case of non-acid WSOC compounds at 80% RH (Figs. 2d and 3d),  
360 ALW increases from  $4.7 \times 10^{-9} \text{ L m}^{-3}$  to  $9.7 \times 10^{-9} \text{ L m}^{-3}$  and from  $9.6 \times 10^{-8} \text{ L m}^{-3}$  to  $1.8 \times 10^{-7} \text{ L}$   
361  $\text{m}^{-3}$  for Baltimore and Beijing, respectively, as the organic mass fraction increases. Similar  
362 trends follow for the 70% and 90% RH scenarios in both cities. This behavior makes sense,  
363 because the inorganic species concentrations and RH were fixed, so adding increasing levels of  
364 water-soluble organics increases the ALW. Increasing the organic dry mass fraction increases  
365 the value of  $\gamma_{H^+}$ , from initial values of 0.10 and 0.16 (80% RH) for Baltimore and Beijing under  
366 inorganic-only conditions, to 2.4 for Baltimore (Fig. 2d) and 1.6 for Beijing (Fig. 3d). The  
367 higher absolute ALW levels in the Beijing simulations are due to the significantly higher  
368 inorganic and organic aerosol loadings.

369 The results follow for the additional RH values studied. For the case of non-acid organics at  
370 70% RH (Figs. 2 and 3) increasing the organic dry mass fraction increases the value of  $\gamma_{H^+}$ , from  
371 initial values of 0.11 and 0.18 for Baltimore and Beijing under inorganic-only conditions, to 1.3  
372 for Baltimore (at an organic dry mass fraction of 0.65) and 2.5 for Beijing (organic dry mass  
373 fraction of 0.67). ALW follows a similar trend at 70% RH as it does at 80% RH, but with lower

374 absolute ALW levels. For the case of non-acid organics at 90% RH, increasing the organic dry  
375 mass fraction increases  $\gamma_{H^+}$  from initial values of 0.12 and 0.20 for Baltimore and Beijing under  
376 inorganic-only conditions, to 1.2 for Baltimore (at an organic dry mass fraction of 0.79) and 0.78  
377 for Beijing (organic dry mass fraction of 0.64). For these simulations, the ALW increases from  
378  $9.1 \times 10^{-9} \text{ L m}^{-3}$  to  $2.4 \times 10^{-8} \text{ L m}^{-3}$  and from  $2.1 \times 10^{-7} \text{ L m}^{-3}$  to  $3.6 \times 10^{-7} \text{ L m}^{-3}$  for Baltimore and  
379 Beijing, respectively. In each case, the data plotted in Figures 1 and 2 are those that are  
380 determined not to have LLPS according to the parameterization of Bertram et al. (2011).

381 The plots of ALW display distinct behaviors attributable to the way in which the water content  
382 was derived for the model systems. For the organic acid simulations, the ALW was taken  
383 directly from the E-AIM Model IV output of aqueous phase water ( $\text{mol m}^{-3}$ ) run with inorganic  
384 and organic acid inputs. For all non-acid organic cases, total ALW ( $W_i + W_o$ ) was determined  
385 according to the manual AIOMFAC output fitting/polynomial fit correlation described in the  
386 methods section (Figure 1). This results in system water behavior described by polynomial fits  
387 of additional water versus organic dry mass fraction.

### 388 **Effects of WSOC on Aerosol pH**

389 The model-predicted effects of WSOC on aerosol pH are shown in Figures 2 - 5. As the dry  
390 organic mass fraction increases, ALW increases as well, since the RH and inorganics are held  
391 constant. This suggests a diluting effect, which would increase pH, in agreement with Guo et al.  
392 (2015). On the other hand,  $\gamma_{H^+}$  also increases with increasing dry organic mass fraction,  
393 indicating that the addition of WSOC compounds increases the acidity (decreases pH).

394 For the case of non-acid WSOC additions (Figs. 2 and 3), increasing the organic mass fraction  
395 decreases the predicted aerosol pH from the initial inorganic-only values from 1.64 to a max of

396 1.94 (Baltimore) and from 4.29 to a max of 4.38 (Beijing) at 80% RH. For the 70% RH  
397 simulations, the model predicted pH changes from 1.49 to a max of 1.88 for Baltimore, and from  
398 4.10 to a max of 4.33 for Beijing. For the 90% RH case, the model predicted pH changes from  
399 1.85 to a max of 2.09 for Baltimore, and from 4.52 to a max of 4.56 for Beijing. The transition  
400 in the pH plots are smooth, where the contour lines reflect individual levels of the factorial  
401 design and highlight the overall trend: as non-acidic WSOC is added, AIOMFAC-predicted  
402 aerosol pH increases for both the Baltimore and Beijing conditions. Since the WSOC leads to  
403 ALW uptake (diluting acidity), the increase in pH comes about due to the increase ALW having  
404 a stronger effect than the increase in  $\gamma_{H^+}$ .

405 For the case of organic acids, increasing the organic mass fraction results in only slight changes  
406 in the predicted aerosol pH for Baltimore (Figure 4), but more pronounced changes for Beijing  
407 (Figure 5). At 80% RH, the predicted pH ranges from an initial (inorganic-only) value of 1.49  
408 (Baltimore) and 4.2 (Beijing) to 1.34 and 2.6, respectively (total range = 0.4 and 1.68 pH units  
409 respectively). Similarly, there is a change from 1.33 to 1.22 (range = 0.34 pH units) for  
410 Baltimore and a change from 4.06 to 2.52 (range=1.58 pH units) for the Beijing simulations at  
411 70% RH. Finally, there is a change from 1.75 to 1.54 (range = 0.47) for Baltimore and a change  
412 from 4.44 to 2.68 (range = 1.78) for Beijing at 90% RH. The ranges represent the total range  
413 spread from highest to lowest model-predicted pH. For Baltimore, organic acids are predicted to  
414 have only a slight effect on aerosol pH. Under the highly acidic conditions typical of the eastern  
415 U.S. (inorganic-only pH ~1), pH changes are always < 0.5 pH units, even when the dry organic  
416 aerosol mass fraction exceeds 60% (corresponding to total aerosol organic acid concentrations up  
417 to  $12 \mu\text{g m}^{-3}$ ). This is likely due to the pH being sufficiently acidic that the organic acid  
418 dissociation is largely inhibited. The undissociated organic acids still contribute ALW and affect

419  $\gamma_{H^+}$ , but the combined effects produce very minor modifications to pH. For Beijing, aerosol pH  
420 changes are predicted to be more substantial with the addition of organic acids, due to the  
421 initially-higher aerosol pH. As organic acids are added, they can dissociate and contribute free  
422  $H^+$ . However, pH changes in excess of 1 pH unit only occur at dry organic mass fractions  $> 0.5$ .  
423 Given the high inorganic aerosol concentrations in Beijing, such pH changes in excess of 1 pH  
424 unit correspond to unrealistically-high aerosol organic acid mass concentrations ( $> 35 \mu\text{g m}^{-3}$ ).  
425 The relatively minor effect of organic acids on aerosol pH in Beijing is partly due to the high  
426 concentrations of ammonia (Tot-NH<sub>x</sub> in Beijing =  $32.8 \mu\text{g m}^{-3}$ ), which also contribute to the  
427 much higher “inorganics-only” pH compared to the eastern U.S. conditions.

428 The effect of organic acids on pH is closely tied to acid strength (i.e.,  $pK_a$  value). Figure 6  
429 shows that organic acids affect pH in the order of their  $pK_a$  values, with oxalic acid ( $pK_{a1} = 1.23$ )  
430  $>$  malonic acid ( $pK_{a1} = 2.83$ )  $>$  glutaric acid ( $pK_{a1} = 4.31$ ) (Lide, 1994). The simulations with a  
431 single organic acid demonstrate this effect most clearly: addition of  $40 \mu\text{g m}^{-3}$  oxalic, malonic,  
432 and glutaric acid produce pH changes of -1.3, -0.5, and -0.2 pH units, respectively. The pH  
433 changes are all negative, indicating that the organic acids have increased particle acidity ( $H^+$ ).  
434 Note that although the molar amounts added are not equivalent, the observed pH changes  
435 represent log-scale changes to the  $H^+$  activity and the effect does proceed in the order of acid  
436 strength.

437 The magnitudes of these observed pH changes, with the exception of the Beijing organic acids  
438 case at high organic mass fractions ( $> 35 \mu\text{g m}^{-3}$  acids concentration) is not expected to  
439 significantly alter particle conditions or lead to substantial changes in particle chemistry. For  
440 example,  $\sim 0.5$  pH unit changes should not significantly alter IEPOX uptake (Xu et al., 2015) or  
441 metal dissolution (Fang et al., 2017), two processes affected by particle acidity. An exception

442 would be conditions where the pH is close to the point where a given species is almost equally  
443 partitioned between the gas and particle phases (*i.e.* on the center/vertical portion of the titration-  
444 style sigmoid curves). This effect is demonstrated in the work of (Guo et al., 2018b; Vasilakos et  
445 al., 2018): when the pH lays on or near the inflection point of the sigmoid curve, a change of 0.5  
446 pH units can have significant effect on species partitioning; however, when the pH is in the  
447 flatter regions of the curve above or below the rapid transitional region, a change of 0.5 pH units  
448 will have negligible effect on partitioning, and thus particle chemistry.

449 Taken together, these results indicate that, despite organic mass fractions greater than 60% (dry  
450 particle mass basis), the combined effects of WSOC species on model-predicted aerosol pH is  
451 only about 0.5 pH units, maximum, with most pH changes < 0.2 pH units. This result is  
452 observed for non-acidic WSOC species and realistic concentrations of organic acids, and for  
453 simulations with a single organic compound added or for mixtures (**Table 2**). This suggests that  
454 the overall effect of WSOC on aerosol pH is quite minimal in conditions where LLPS does not  
455 occur. This finding holds only for systems in which there is no LLPS and the solvent is H<sub>2</sub>O.  
456 For systems in which LLPS does occur, a condition expected in systems with O:C ratio of the  
457 organic material  $\leq 0.5$ , or RH < 60% with organic:sulfate mass ratio < 1 (Bertram et al., 2011;  
458 You et al., 2013), the situation becomes more complicated. As LLPS scenarios still require  
459 equilibrium between both predominantly-aqueous and predominately-organic phases, there is  
460 both water and inorganic ions (including H<sup>+</sup>) in the organic phase, and organics in the inorganic-  
461 rich aqueous phase (Zuend and Seinfeld, 2012; Pye et al., 2018). Thus the IUPAC definition of  
462 pH could be applied to either phase so long as H<sup>+</sup> activity could be defined, necessitating an  
463 understanding of if and when LLPS occurs, and the phase for which pH is being reported.



464 This work stands apart from, but connects to related works. (Pye et al., 2018) specifically  
465 examined the effects of LLPS, but the present study examines a different particle regime  
466 altogether (single aqueous phase with water, inorganics, and organics); instances where LLPS  
467 were predicted to occur were excluded from the analysis for this reason.

468 Our findings are supported by the work of (Song et al., 2018b), who utilized E-AIM Model IV  
469 and ISORROPIA to model the same Beijing winter haze conditions, and found that addition of  
470 oxalic acid (set at 20% of the sulfate concentration) to their model in E-AIM produced  
471 reductions in pH of only 0.07 pH units. Our results are also consistent with those of (Vasilakos  
472 et al., 2018), who observed a similarly minor effect of oxalate addition on aerosol pH in the  
473 Eastern U.S., and (Nah et al., 2018) where oxalic acid/oxalate gas-particle partitioning predicted  
474 without considering organic species in the thermodynamic analysis was in reasonable agreement  
475 with measurements. Our results indicate that additions of weaker organic acids, even at higher  
476 concentrations, would have even less of an effect on pH.

477 A limitation of this study is that the model simulations were only run at three RH levels (70%,  
478 80%, and 90%), with metastable conditions enforced at all times. However, aerosol particles  
479 progress through a wider RH range in the atmosphere, with concomitant effects on aerosol liquid  
480 water and phase transitions. Future work would need to expand on the RH range in order to  
481 elucidate the behavior as the system transitions from the LLPS condition to the fully mixed  
482 aqueous condition, and the contribution of changing ALW. Additionally, the use of E-AIM  
483 Model IV imposes composition limitations on the inputs (i.e., no support for  $\text{Ca}^{2+}$ ,  $\text{Mg}^{2+}$ , or  $\text{K}^+$ ;  
484 limited support for  $\text{Na}^+$  in the presence of  $\text{NH}_4^+$  and  $\text{Cl}^-$ ), necessitating the use of equivalent  
485 cations to maintain electroneutrality in the model inputs. Combined with the use of metastable  
486 calculations, there exists a potential source of error in the solution activity if these species are

487 considered and allowed to precipitate out in the thermodynamic model calculations (e.g.,  
488  $\text{CaSO}_4$ ). As AIOMFAC relies on specific, uniquely-defined functional group interactions in the  
489 composition of activity coefficients, the exchange of a non-supported cation in E-AIM for a  
490 charge-equivalent cation may have effects on the output unknown to us carried through to the  
491 calculation of the species activity coefficients in AIOMFAC; this is a limitation of  
492 thermodynamic models that has been previously discussed (Jacobson, 1999; Kim and Seinfeld,  
493 1995).

494 Another limitation of this study is consideration of only six WSOC species, despite hundreds or  
495 thousands being present in atmospheric particles. This is a limitation we acknowledge, but is  
496 based on the significant number of model runs given the factorial design paradigm, and the  
497 decision to utilize only compounds predefined in the thermodynamic models (particularly the  
498 AIOMFAC model, which allows users to create organic molecules by combining subgroups).  
499 Because the compounds selected here have relatively low molecular weight (MW), is it possible  
500 that higher MW compounds, such as humic-like substances (HULIS), may impart a different  
501 effect. However, given the consistent results found here for both Baltimore and Beijing  
502 conditions across the 70-90% RH range, and at organic dry mass fractions that range from 0 -  
503 60% utilizing WSOC containing four moieties, we feel our results do represent conditions in  
504 atmospheric particles. Future studies would be necessary to expand the selection of WSOC  
505 compounds, and thus broaden the results reported here. **Because we have forced the metastable**  
506 **mode on our use of the models, the system mixing state becomes another potentially significant**  
507 **source of error. Here we have considered only internally mixed aerosol particles without LLPS,**  
508 **a case that may not exist given the concentration of organic species utilized in the model study;**  
509 **formation of solid precipitates may occur, which has the potential to drastically alter the aqueous**

510 **phase activity values**. The most significant restriction of this study is the lack of observational  
511 data for comparison. Direct measurements of particle pH have so far been restricted to simple  
512 laboratory particles of specific super-micron sizes and compositions (Rindelaub et al., 2016).

#### 513 **4. Conclusions and Implications**

514 In this work, the effects of WSOC on model-predicted aerosol pH were evaluated. Different  
515 inorganic datasets from Baltimore and Beijing winter haze conditions representing distinct  
516 inorganic composition regimes were first modeled in aerosol thermodynamic equilibrium models  
517 (E-AIM or ISORROPIA), then combined with six different organic species in AIOMFAC to  
518 determine the effects on aqueous-phase  $\gamma_{H^+}$  and  $a_{H^+}$ . We find that the effects of non-acid WSOC  
519 species to each of the regions has only a modest effect on aerosol pH (< 0.5 pH units, with most  
520 < 0.2 pH units). These small effects on pH were predicted even up to organic dry mass in excess  
521 of 60%. Organic acids are predicted to have a similarly small effect on pH in the eastern U.S. **In**  
522 **Beijing, organic acids can have larger effects on pH (in excess of 2 pH units), but require**  
523 **stronger organic acids (pK<sub>a</sub> values lower than the inorganic-only pH) present at high**  
524 **concentrations, on the same order of molar concentration as the dissociating inorganic species.**

525 The magnitude of these changes to aerosol pH are consistent with the results predicted by  
526 previous studies that considered only inorganic aerosol components combined with *a priori*  
527 knowledge of organic mass, organic water contribution, and organic species hygroscopicity (Guo  
528 et al., 2015; Bougiatioti et al., 2016).

529 The results of this study have important implications for the aerosol modeling community as well  
530 as for experimental studies that utilize phase partitioning data to constrain aerosol pH. Previous  
531 studies have postulated on the effect of organic species while ignoring their inclusion, or

532 included them in order to elucidate the effects of LLPS, but this study demonstrates that in the  
533 case of single-phase systems, including these species may only contribute unnecessary  
534 complexity to the model runs. As their effects are predominantly  $< 0.5$  pH units, it is not  
535 expected that the inclusion of organics will cause the pH of the system to reach any significant  
536 transitions unless the organic components have already driven the system to a sensitive portion  
537 of the species partitioning sigmoid curves, or aerosols in which there is significant phase  
538 separation. This work demonstrates that inclusion of large quantities of organic components  
539 does not appear to have a significant effect on model-predicted aerosol pH, consistent with the  
540 findings of (Guo et al., 2018a) and Vasilakos et al. (2018). Based on the species and  
541 concentrations of the organics studied here, future aerosol modeling studies carried out under  
542 conditions where LLPS is not occurring may be justified in the use of inorganic-only aerosol  
543 thermodynamic equilibrium models to predict aerosol pH without the direct inclusion of organic  
544 species.

## 545 **5. Acknowledgements**

546 M.A.B. and C.J.H. were supported by NSF Grant # CHE-1454763. A.N. acknowledges support  
547 from the project PyroTRACH (ERC-2016-COG) funded from H2020-EU.1.1. - Excellent  
548 Science - European Research Council (ERC), project ID 726165. R.J.W. recognizes support  
549 from the US EPA under grant 835882.

## 550 6. References

- 551 CRC Handbook of Chemistry and Physics, 75<sup>th</sup> ed., edited by: Lide, D. R., CRC Press, Inc., Ann  
552 Arbor, MI,
- 553 Ahrens, L., et al.: Improved characterization of gas–particle partitioning for per- and  
554 polyfluoroalkyl substances in the atmosphere using annular diffusion denuder samplers,  
555 Environmental Science & Technology, 46, 7199-7206, 10.1021/es300898s, 2012.
- 556 Battaglia, M. A., Douglas, S., and Hennigan, C. J.: Effect of the Urban Heat Island on Aerosol  
557 pH, Environmental Science & Technology, 51, 13095-13103, 10.1021/acs.est.7b02786, 2017.
- 558 Bertram, A. K., et al.: Predicting the relative humidities of liquid-liquid phase separation,  
559 efflorescence, and deliquescence of mixed particles of ammonium sulfate, organic material, and  
560 water using the organic-to-sulfate mass ratio of the particle and the oxygen-to-carbon elemental  
561 ratio of the organic component, Atmospheric Chemistry and Physics, 11, 10995-11006,  
562 10.5194/acp-11-10995-2011, 2011.
- 563 Bikkina, S., Kawamura, K., and Miyazaki, Y.: Latitudinal distributions of atmospheric  
564 dicarboxylic acids, oxocarboxylic acids, and -dicarbonyls over the western North Pacific:  
565 Sources and formation pathways, Journal of Geophysical Research-Atmospheres, 120, 5010-  
566 5035, 10.1002/2014jd022235, 2015.
- 567 Bougiatioti, A., et al.: Particle water and pH in the eastern Mediterranean: source variability and  
568 implications for nutrient availability, Atmospheric Chemistry and Physics, 16, 4579-4591,  
569 10.5194/acp-16-4579-2016, 2016.
- 570 Carlton, A. G., Wiedinmyer, C., and Kroll, J. H.: A review of Secondary Organic Aerosol (SOA)  
571 formation from isoprene, Atmos Chem Phys, 9, 4987-5005, 2009.
- 572 Chameides, W. L.: The Photochemistry of a Remote Marine Stratiform Cloud, Journal of  
573 Geophysical Research-Atmospheres, 89, 4739-4755, 10.1029/JD089iD03p04739, 1984.
- 574 Dallemagne, M. A., Huang, X. Y., and Eddingsaas, N. C.: Variation in pH of Model Secondary  
575 Organic Aerosol during Liquid-Liquid Phase Separation, Journal of Physical Chemistry A, 120,  
576 2868-2876, 10.1021/acs.jpca.6b00275, 2016.
- 577 Fang, T., et al.: Highly Acidic Ambient Particles, Soluble Metals, and Oxidative Potential: A  
578 Link between Sulfate and Aerosol Toxicity, Environ Sci Technol, 51, 2611-2620,  
579 10.1021/acs.est.6b06151, 2017.
- 580 Fountoukis, C., and Nenes, A.: ISORROPIA II: a computationally efficient thermodynamic  
581 equilibrium model for  $K^+$ - $Ca^{2+}$ - $Mg^{2+}$ - $NH_4^+$ - $Na^+$ - $SO_4^{2-}$ - $NO_3^-$ - $Cl^-$ - $H_2O$  aerosols, Atmos. Chem.  
582 Phys., 7, 4639-4659, 10.5194/acp-7-4639-2007, 2007.
- 583 Freedman, M. A.: Phase separation in organic aerosol, Chem Soc Rev, 46, 7694-7705,  
584 10.1039/c6cs00783j, 2017.

585 Friese, E., and Ebel, A.: Temperature Dependent Thermodynamic Model of the System H+  
586 NH<sub>4</sub><sup>+</sup>-Na<sup>+</sup>-SO<sub>4</sub><sup>2-</sup>-NO<sub>3</sub><sup>-</sup>-Cl<sup>-</sup>-H<sub>2</sub>O, *J. Phys. Chem. A*, 114, 11595-11631, 10.1021/jp101041j,  
587 2010.

588 Guo, H., et al.: Fine-particle water and pH in the southeastern United States, *Atmos Chem Phys*,  
589 15, 5211-5228, 10.5194/acp-15-5211-2015, 2015.

590 Guo, H., et al.: Fine particle pH and the partitioning of nitric acid during winter in the  
591 northeastern United States, *Journal of Geophysical Research: Atmospheres*, 121, 10,355-  
592 310,376, 10.1002/2016JD025311, 2016.

593 Guo, H., et al.: Fine particle pH and gas-particle phase partitioning of inorganic species in  
594 Pasadena, California, during the 2010 CalNex campaign, *Atmos. Chem. Phys.*, 17, 5703-5719,  
595 10.5194/acp-17-5703-2017, 2017.

596 Guo, H., Nenes, A., and Weber, R. J.: The underappreciated role of nonvolatile cations in aerosol  
597 ammonium-sulfate molar ratios, *Atmos. Chem. Phys.*, 18, 17307-17323, 10.5194/acp-18-17307-  
598 2018, 2018a.

599 Guo, H., et al.: Effectiveness of ammonia reduction on control of fine particle nitrate, *Atmos.*  
600 *Chem. Phys.*, 18, 12241-12256, 10.5194/acp-18-12241-2018, 2018b.

601 Gwynn, R. C., Burnett, R. T., and Thurston, G. D.: A time-series analysis of acidic particulate  
602 matter and daily mortality and morbidity in the Buffalo, New York, region, *Environ Health*  
603 *Persp*, 108, 125-133, Doi 10.2307/3454510, 2000.

604 Hallquist, M., et al.: The formation, properties and impact of secondary organic aerosol: current  
605 and emerging issues, *Atmospheric Chemistry and Physics*, 9, 5155-5236, 2009.

606 Hennigan, C. J., et al.: A critical evaluation of proxy methods used to estimate the acidity of  
607 atmospheric particles, *Atmospheric Chemistry and Physics*, 15, 2775-2790, 10.5194/acp-15-  
608 2775-2015, 2015.

609 Huang, R.-J., et al.: High secondary aerosol contribution to particulate pollution during haze  
610 events in China, *Nature*, 514, 218-222, 10.1038/nature13774, 2014.

611 Jacobson, M. Z.: Studying the effects of calcium and magnesium on size-distributed nitrate and  
612 ammonium with EQUISOLV II, *Atmos Environ*, 33, 3635-3649, Doi 10.1016/S1352-  
613 2310(99)00105-3, 1999.

614 Jia, S., et al.: Technical note: Comparison and interconversion of pH based on different standard  
615 states for aerosol acidity characterization, *Atmos. Chem. Phys.*, 18, 11125-11133, 10.5194/acp-  
616 18-11125-2018, 2018.

617 Johnson, A. H., et al.: Seven Decades of Calcium Depletion in Organic Horizons of Adirondack  
618 Forest Soils, *Soil Science Society of America Journal*, 72, 1824-1830, 10.2136/sssaj2006.0407,  
619 2008.

620 Kanakidou, M., et al.: Past, Present, and Future Atmospheric Nitrogen Deposition, *Journal of the*  
621 *Atmospheric Sciences*, 73, 2039-2047, 10.1175/jas-d-15-0278.1, 2016.

622 Kawamura, K., and Bikkina, S.: A review of dicarboxylic acids and related compounds in  
623 atmospheric aerosols: Molecular distributions, sources and transformation, *Atmos Res*, 170, 140-  
624 160, 10.1016/j.atmosres.2015.11.018, 2016.

625 Keene, W. C., et al.: Aerosol pH in the marine boundary layer: A review and model evaluation, *J*  
626 *Aerosol Sci*, 29, 339-356, Doi 10.1016/S0021-8502(97)10011-8, 1998.

627 Keene, W. C., et al.: Closure evaluation of size-resolved aerosol pH in the New England coastal  
628 atmosphere during summer, *Journal of Geophysical Research: Atmospheres*, 109, D23307,  
629 10.1029/2004jd004801, 2004.

630 Keppel, G.: *Design and Analysis: A Researcher's Handbook*, 3rd ed., Prentice-Hall, Inc.,  
631 Englewood Cliffs, NJ, US, 1991.

632 Kim, Y. P., and Seinfeld, J. H.: Atmospheric Gas-Aerosol Equilibrium .3. Thermodynamics of  
633 Crustal Elements Ca<sup>2+</sup>, K<sup>+</sup>, and Mg<sup>2+</sup>, *Aerosol Sci Tech*, 22, 93-110, Doi  
634 10.1080/02786829408959730, 1995.

635 Myriokefalitakis, S., et al.: Bioavailable atmospheric phosphorous supply to the global ocean: a  
636 3-D global modeling study, *Biogeosciences*, 13, 6519-6543, 10.5194/bg-13-6519-2016, 2016.

637 Myriokefalitakis, S., et al.: Reviews and syntheses: the GESAMP atmospheric iron deposition  
638 model intercomparison study, *Biogeosciences*, 15, 6659-6684, 10.5194/bg-15-6659-2018, 2018.

639 Nah, T., et al.: Characterization of aerosol composition, aerosol acidity, and organic acid  
640 partitioning at an agriculturally intensive rural southeastern US site, *Atmos. Chem. Phys.*, 18,  
641 11471-11491, 10.5194/acp-18-11471-2018, 2018.

642 Nenes, A., et al.: Atmospheric acidification of mineral aerosols: a source of bioavailable  
643 phosphorus for the oceans, *Atmos Chem Phys*, 11, 6265-6272, DOI 10.5194/acp-11-6265-2011,  
644 2011.

645 Peters, A., et al.: Acute health effects of exposure to high levels of air pollution in eastern  
646 Europe, *Am J Epidemiol*, 144, 570-581, 1996.

647 Pye, H. O. T., et al.: Coupling of organic and inorganic aerosol systems and the effect on gas-  
648 particle partitioning in the southeastern US, *Atmos. Chem. Phys.*, 18, 357-370, 10.5194/acp-18-  
649 357-2018, 2018.

650 Rindelaub, J. D., et al.: Direct Measurement of pH in Individual Particles via Raman  
651 Microspectroscopy and Variation in Acidity with Relative Humidity, *Journal of Physical*  
652 *Chemistry A*, 120, 911-917, 10.1021/acs.jpca.5b12699, 2016.

653 Robinson, R. A., and Stokes, R. H.: *Electrolyte solutions*, 2nd revised ed., Butterworths, London,  
654 1965.

655 Schindler, D. W.: Effects of acid rain on freshwater ecosystems, *Science*, 239, 149-157,  
656 10.1126/science.239.4836.149, 1988.

657 Seinfeld, J. H., and Pandis, S. N.: Atmospheric chemistry and physics: from air pollution to  
658 climate change, 3 ed., John Wiley & Sons, Hoboken, 2016.

659 Song, M., et al.: Liquid-liquid phase separation in organic particles containing one and two  
660 organic species: importance of the average O: C, *Atmospheric Chemistry and Physics*, 18,  
661 12075-12084, 10.5194/acp-18-12075-2018, 2018a.

662 Song, S., et al.: Fine-particle pH for Beijing winter haze as inferred from different  
663 thermodynamic equilibrium models, *Atmos. Chem. Phys.*, 18, 7423-7438, 10.5194/acp-18-7423-  
664 2018, 2018b.

665 Spengler, J. D., et al.: Health effects of acid aerosols on North American children: Air pollution  
666 exposures, *Environ Health Persp*, 104, 492-499, Doi 10.2307/3432989, 1996.

667 Tan, T. Y., et al.: New insight into PM<sub>2.5</sub> pollution patterns in Beijing based on one-year  
668 measurement of chemical compositions, *Science of the Total Environment*, 621, 734-743,  
669 10.1016/j.scitotenv.2017.11.208, 2018.

670 Trebs, I., et al.: The NH<sub>4</sub><sup>+</sup>-NO<sub>3</sub><sup>-</sup>-Cl<sup>-</sup>-SO<sub>4</sub><sup>2-</sup>-H<sub>2</sub>O aerosol system and its gas phase precursors at  
671 a pasture site in the Amazon Basin: how relevant are mineral cations and soluble organic acids?,  
672 *Journal of Geophysical Research: Atmospheres*, 110, 10.1029/2004jd005478, 2005.

673 Vasilakos, P., Russell, A., Weber, R., and Nenes, A.: Understanding nitrate formation in a world  
674 with less sulfate, *Atmos. Chem. Phys.*, 18, 12765-12775, 10.5194/acp-18-12765-2018, 2018.

675 Wang, G., et al.: Persistent sulfate formation from London Fog to Chinese haze, *Proceedings of*  
676 *the National Academy of Sciences*, 10.1073/pnas.1616540113, 2016.

677 Weber, R. J., Guo, H., Russell, A. G., and Nenes, A.: High aerosol acidity despite declining  
678 atmospheric sulfate concentrations over the past 15 years, *Nature Geoscience*, 9, 282-285,  
679 10.1038/ngeo2665, 2016.

680 Wexler, A. S., and Clegg, S. L.: Atmospheric aerosol models for systems including the ions H<sup>+</sup>,  
681 NH<sub>4</sub><sup>+</sup>, Na<sup>+</sup>, SO<sub>4</sub><sup>2-</sup>, NO<sub>3</sub><sup>-</sup>, Cl<sup>-</sup>, Br<sup>-</sup>, and H<sub>2</sub>O, *J Geophys Res-Atmos*, 107, Artn 4207  
682 Doi 10.1029/2001jd000451, 2002.

683 Xu, L., et al.: Effects of anthropogenic emissions on aerosol formation from isoprene and  
684 monoterpenes in the southeastern United States, *Proceedings of the National Academy of*  
685 *Sciences*, 112, 37-42, 10.1073/pnas.1417609112, 2015.

686 Yatavelli, R. L. N., et al.: Estimating the contribution of organic acids to northern hemispheric  
687 continental organic aerosol, *Geophysical Research Letters*, 42, 6084-6090,  
688 10.1002/2015gl064650, 2015.



689 You, Y., Renbaum-Wolff, L., and Bertram, A. K.: Liquid-liquid phase separation in particles  
690 containing organics mixed with ammonium sulfate, ammonium bisulfate, ammonium nitrate or  
691 sodium chloride, *Atmos. Chem. Phys.*, 13, 11723-11734, 10.5194/acp-13-11723-2013, 2013.

692 Zhou, W., et al.: Characterization and source apportionment of organic aerosol at 260 m on a  
693 meteorological tower in Beijing, China, *Atmospheric Chemistry and Physics*, 18, 3951-3968,  
694 10.5194/acp-18-3951-2018, 2018.

695 Zuend, A., Marcolli, C., Luo, B. P., and Peter, T.: A thermodynamic model of mixed organic-  
696 inorganic aerosols to predict activity coefficients, *Atmospheric Chemistry and Physics*, 8, 4559-  
697 4593, 2008.

698 Zuend, A., et al.: New and extended parameterization of the thermodynamic model AIOMFAC:  
699 calculation of activity coefficients for organic-inorganic mixtures containing carboxyl, hydroxyl,  
700 carbonyl, ether, ester, alkenyl, alkyl, and aromatic functional groups, *Atmos. Chem. Phys.*, 11,  
701 9155-9206, 10.5194/acp-11-9155-2011, 2011.

702 Zuend, A., and Seinfeld, J. H.: Modeling the gas-particle partitioning of secondary organic  
703 aerosol: the importance of liquid-liquid phase separation, *Atmospheric Chemistry and Physics*,  
704 12, 3857-3882, 10.5194/acp-12-3857-2012, 2012.

705

706

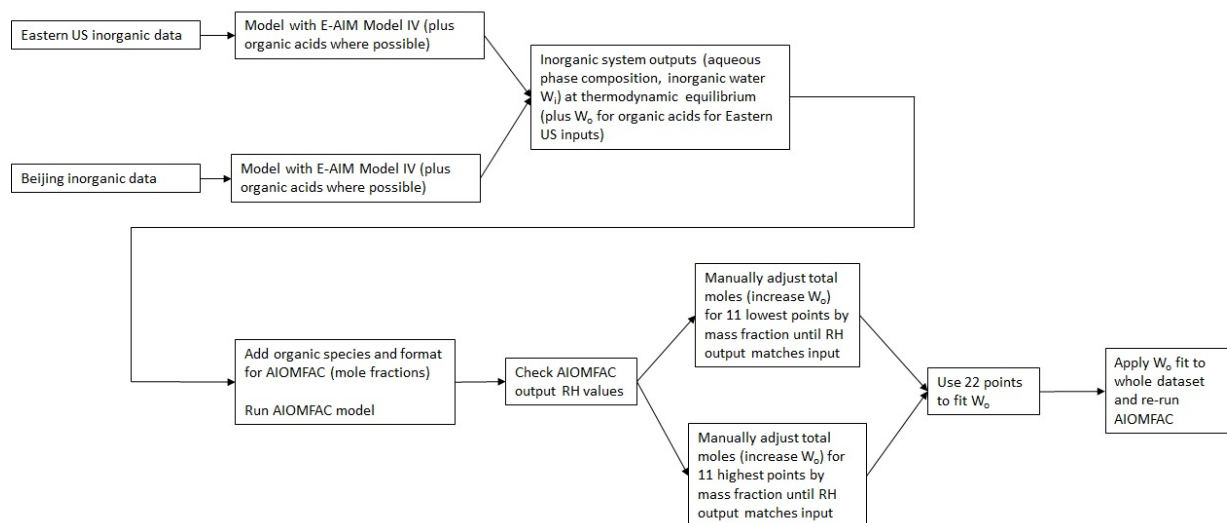

707  
 708 **Figure 1:** Flow diagram for adjusting total moles in the organic/inorganic mixed system inputs  
 709 for the AIOMFAC model. Total moles were adjusted (representing increased  $W_o$ ) of the first 11  
 710 and last 11 model points until the AIOMFAC-output RH was within 5% of the fixed model input  
 711 value (70%, 80%, or 90%). These 22 points were then used to fit a polynomial function to  
 712 correct the total system moles for the remaining 1309 data points.

713

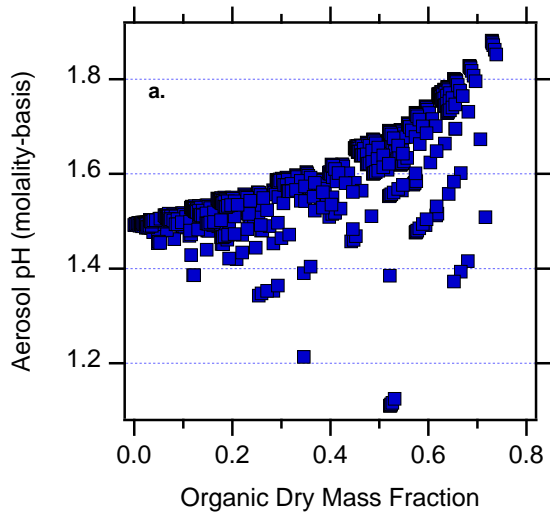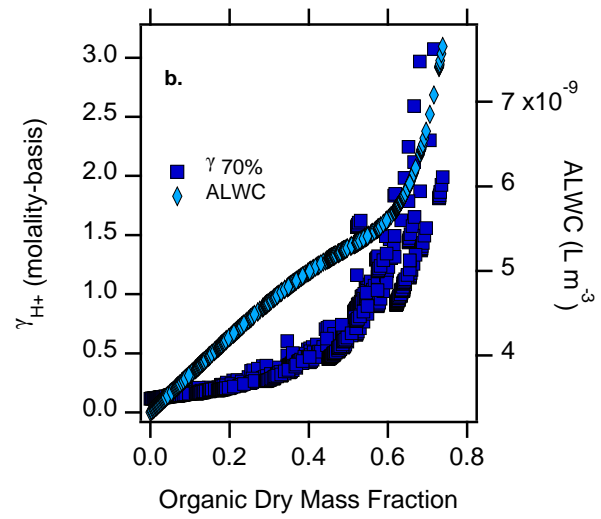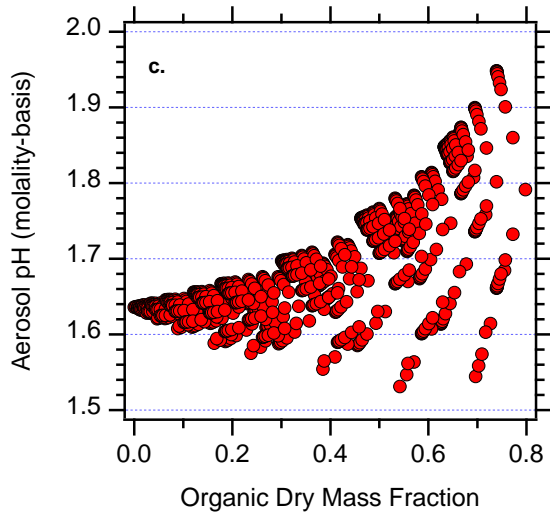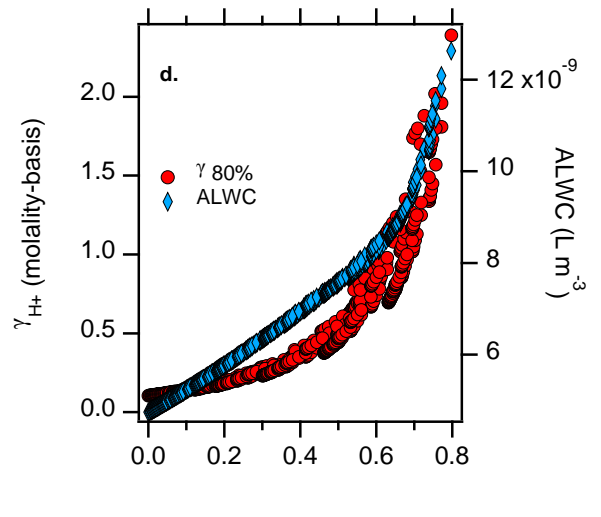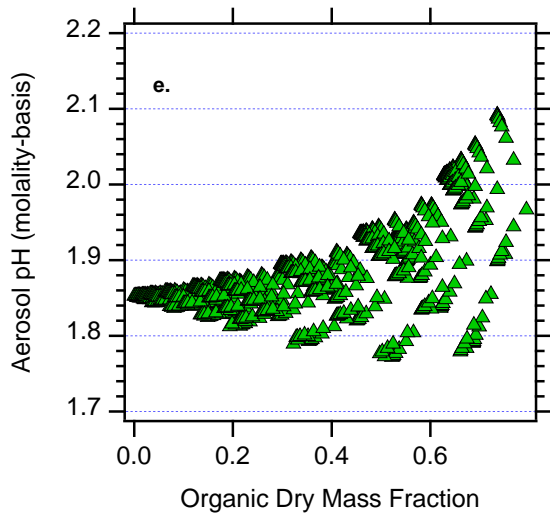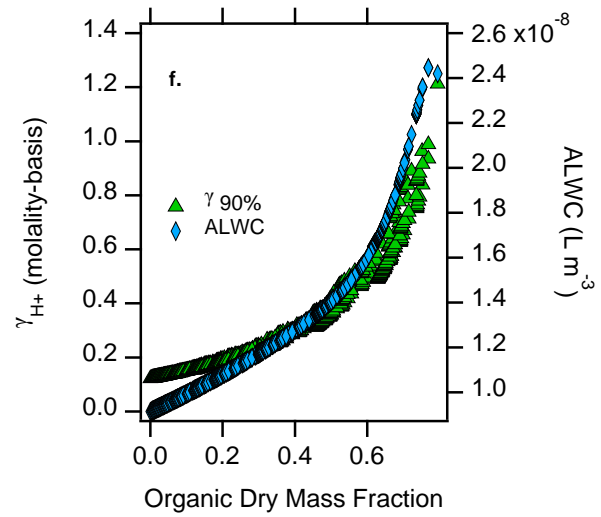

715 **Figure 2:** AIOMFAC-modeled aerosol pH (molality basis) versus organic dry mass fraction  
716 with the factorial addition of non-acid organic species and AIOMFAC-modeled  $\gamma_{H^+}$  (molality  
717 basis) and aerosol liquid water (ALW, polynomial fit to AIOMFAC output) versus organic dry  
718 mass fraction (right panel) for Baltimore at a) and b) 70% RH, c) and d) 80% RH, and e) and f)  
719 90% RH.

720

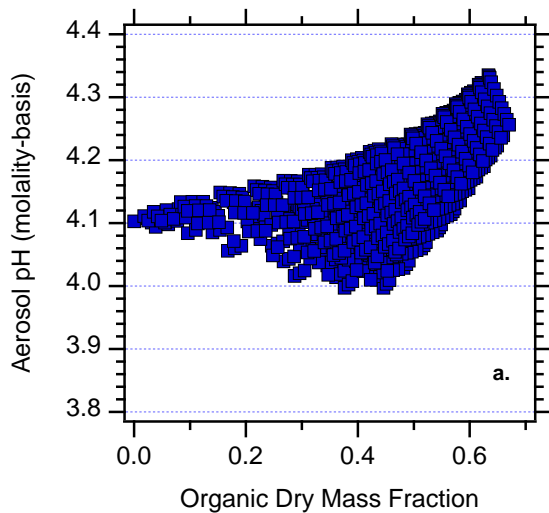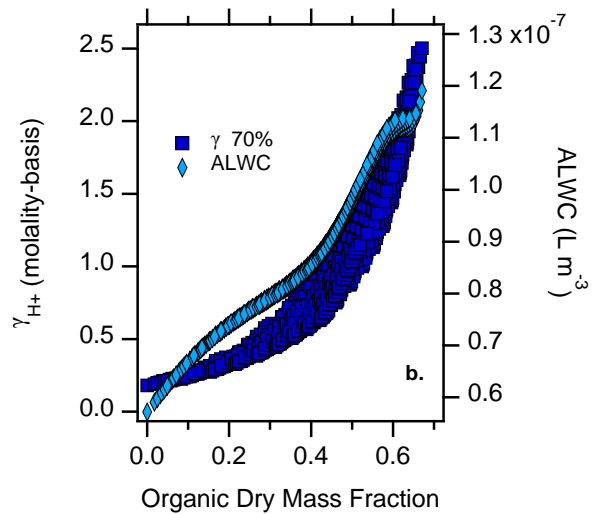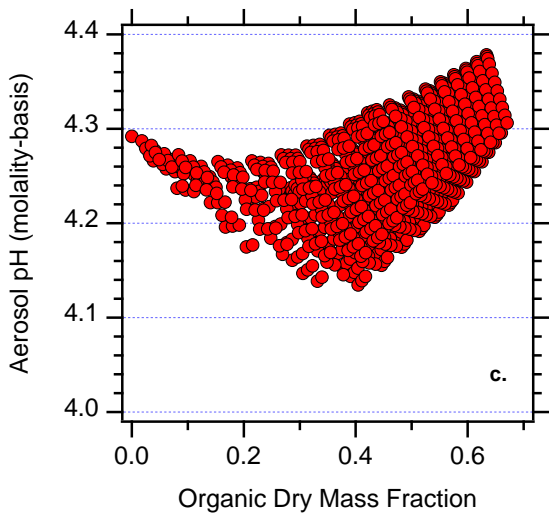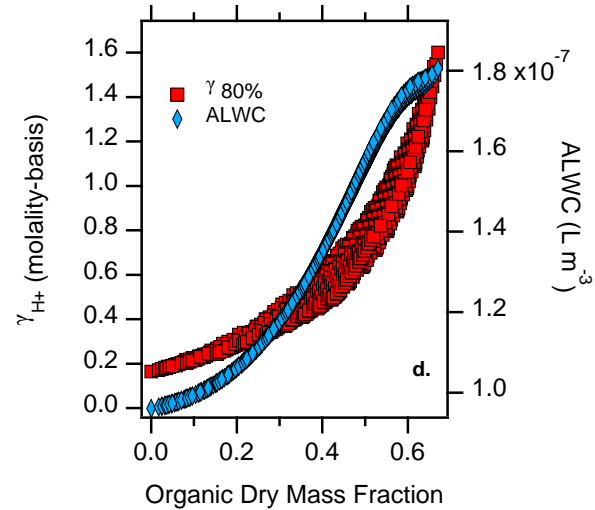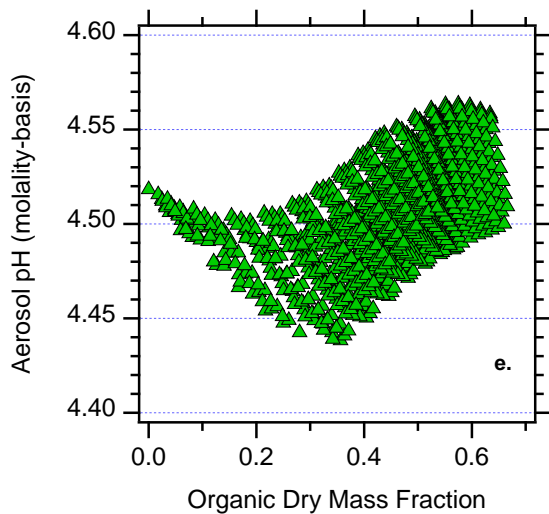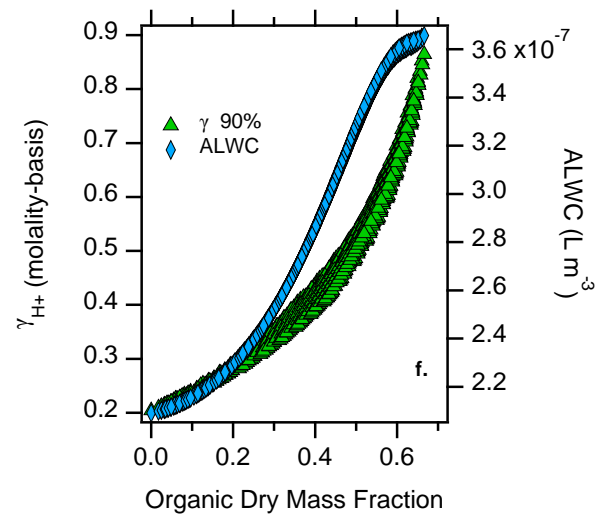

722 **Figure 3:** AIOMFAC-modeled aerosol pH (molality basis) versus organic dry mass fraction  
723 with the factorial addition of non-acid organic species and AIOMFAC-modeled  $\gamma_{H^+}$  (molality  
724 basis) and aerosol liquid water (ALW, polynomial fit to AIOMFAC output) versus organic dry  
725 mass fraction (right panel) for Beijing at a) and b) 70% RH, c) and d) 80% RH, and e) and f)  
726 90% RH.

727

728

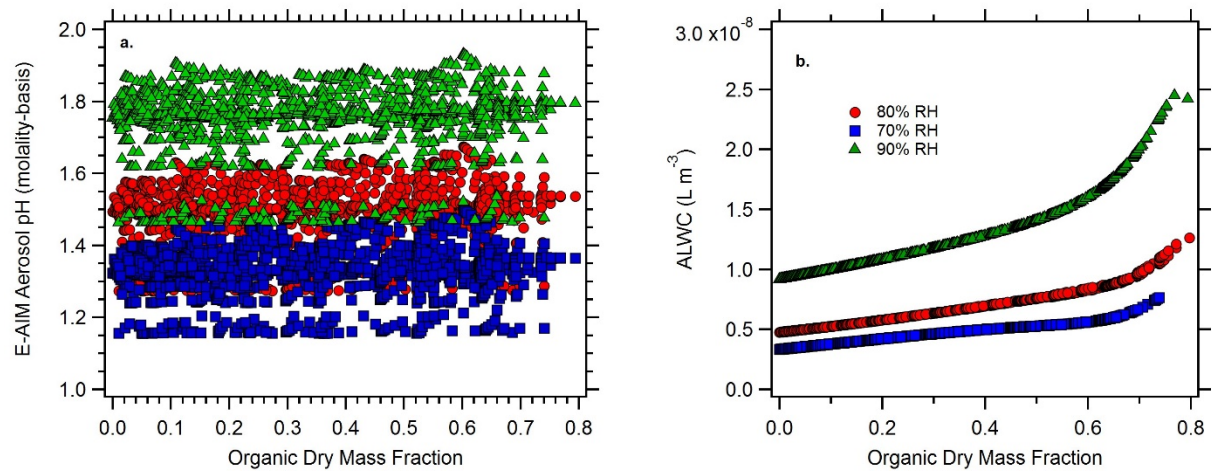

729

730 **Figure 4:** E-AIM-modeled (a) aerosol pH (molality basis) and (b) ALW at 70% (blue), 80%

731 (red), and 90% RH (green) levels for the Baltimore simulations with organic acids.

732

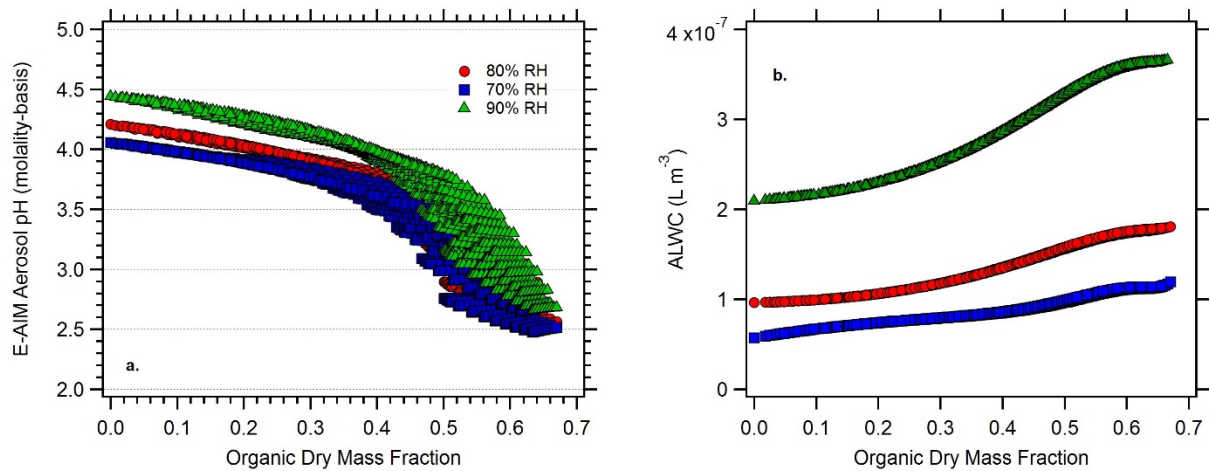

**Figure 5:** E-AIM-modeled (a) aerosol pH (molality basis) and (b) ALW at 70% (blue), 80% (red), and 90% RH (green) levels for the Beijing simulations with organic acids.



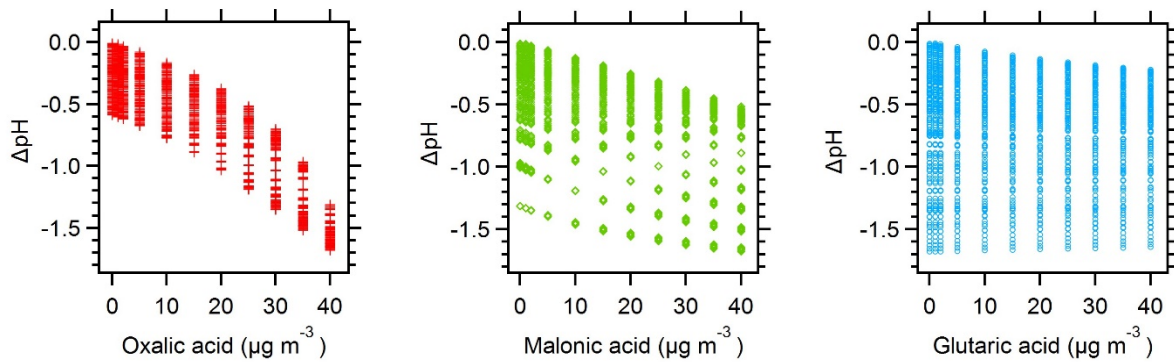

**Figure 6:**  $\Delta\text{pH}$  vs. discrete organic acid levels for the organic acid pH calculations carried out in E-AIM for Baltimore and Beijing.  $\Delta\text{pH}$  represents the difference between the initial ‘inorganic-only’ pH prediction and all other model evaluations where organic acids were present.

- 1 **Table 1:** Summary of model runs performed for the study. Inorganic composition is invariant  
 2 and taken from the sources provided. Organic components were added in factorial fashion.

| <b>Location</b> | <b>Inorganic Data</b> | <b>Inorganic<br/>Equilibrium Model</b> | <b>Organic<br/>components</b> | <b># of Points</b> |
|-----------------|-----------------------|----------------------------------------|-------------------------------|--------------------|
| Baltimore       | Battaglia et al. 2017 | E-AIM Model IV                         | Organic Acids                 | 1331               |
| Baltimore       | Battaglia et al. 2017 | E-AIM Model IV                         | Non-acid organics             | 1331               |
| Beijing         | Guo et al. 2018b      | ISORROPIA 2.3<br>E-AIM Model IV        | Organic acids                 | 1331               |
| Beijing         | Guo et al. 2018b      | ISORROPIA 2.3<br>E-AIM Model IV        | Non-acid organics             | 1331               |

3

4 **Table 2:** Whole species inorganic inputs used in AIOMFAC modeling at 70%, 80%, or 90% RH. Inorganic equilibrium outputs were  
5 used to assign anions to cations to form whole species, represented here. Entries marked with a dash represent components not used  
6 for the given location as a result of anion or cation not being present in the composition data (species not measured).

| <b>Component</b>                                | <b>Baltimore<br/>Conc. (mol m<sup>-3</sup>)<br/>70% RH</b> | <b>Baltimore<br/>Conc. (mol m<sup>-3</sup>)<br/>80% RH</b> | <b>Baltimore<br/>Conc. (mol m<sup>-3</sup>)<br/>90% RH</b> | <b>Beijing Conc.<br/>(mol m<sup>-3</sup>)<br/>70% RH</b> | <b>Beijing Conc.<br/>(mol m<sup>-3</sup>)<br/>80% RH</b> | <b>Beijing Conc.<br/>(mol m<sup>-3</sup>)<br/>90% RH</b> |
|-------------------------------------------------|------------------------------------------------------------|------------------------------------------------------------|------------------------------------------------------------|----------------------------------------------------------|----------------------------------------------------------|----------------------------------------------------------|
| H <sub>2</sub> SO <sub>4</sub>                  | $1.488 \times 10^{-10}$                                    | $2.418 \times 10^{-10}$                                    | $3.326 \times 10^{-10}$                                    | $3.13 \times 10^{-12}$                                   | $6.273 \times 10^{-12}$                                  | $1.010 \times 10^{-11}$                                  |
| NH <sub>4</sub> HSO <sub>4</sub>                | $3.460 \times 10^{-9}$                                     | $2.612 \times 10^{-9}$                                     | $1.899 \times 10^{-9}$                                     | $4.057 \times 10^{-11}$                                  | $3.173 \times 10^{-11}$                                  | $2.307 \times 10^{-11}$                                  |
| (NH <sub>4</sub> ) <sub>2</sub> SO <sub>4</sub> | $2.395 \times 10^{-8}$                                     | $2.318 \times 10^{-8}$                                     | $2.425 \times 10^{-8}$                                     | $2.710 \times 10^{-7}$                                   | $2.710 \times 10^{-7}$                                   | $2.710 \times 10^{-7}$                                   |
| NaNO <sub>3</sub>                               | $6.425 \times 10^{-11}$                                    | $1.207 \times 10^{-10}$                                    | $3.573 \times 10^{-10}$                                    | -                                                        | -                                                        | -                                                        |
| Na <sub>2</sub> SO <sub>4</sub>                 | $1.403 \times 10^{-9}$                                     | $1.375 \times 10^{-9}$                                     | $1.257 \times 10^{-9}$                                     | -                                                        | -                                                        | -                                                        |
| NH <sub>4</sub> Cl                              | -                                                          | -                                                          | -                                                          | $4.793 \times 10^{-8}$                                   | $4.797 \times 10^{-8}$                                   | $4.799 \times 10^{-8}$                                   |
| NH <sub>4</sub> NO <sub>3</sub>                 | -                                                          | -                                                          | -                                                          | $4.189 \times 10^{-7}$                                   | $4.189 \times 10^{-7}$                                   | $4.190 \times 10^{-7}$                                   |

7
